# Supplementary material for: Asymmetric organocatalytic Michael–α-amination sequence for the construction of a quaternary stereocenter
Source: Royal Society of Chemistry journal article supplement (doi:10.1039/c0ob00751j), 2010-12-07

## **Asymmetric synthesis of quaternary $\alpha$ -hydrazino aldehydes via an organocatalytic Michael/ $\alpha$ -amination sequence.**

Alaric Desmarchelier, Jérôme Marrot, Xavier Moreau and Christine Greck

*Institut Lavoisier de Versailles, UMR CNRS 8180, Université de Versailles-St-  
 Quentin-en Yvelines, 45 Avenue des Etats-Unis, 78035 Versailles cedex, France.*

*moreau@chimie.uvsq.fr, greck@chimie.uvsq.fr*

### **Table of Contents**

|                                                   |    |
|---------------------------------------------------|----|
| General Methods                                   | 2  |
| Experimental procedures and characterization data | 3  |
| $^1\text{H}$ and $^{13}\text{C}$ NMR Spectra      | 10 |
| HLPC Traces                                       | 22 |

## General methods

All reactions were carried out in air and using undistilled solvent, without any precautions to exclude moisture unless otherwise noted. Purification of reaction products was carried out by flash chromatography (FC) on silica gel (230-400 mesh). Yields refer to chromatographically and spectroscopically pure compounds. The  $^1\text{H}$  and  $^{13}\text{C}$  NMR spectra were recorded at 300 MHz and 75 MHz, respectively. The chemical shifts ( $\delta$ ) for  $^1\text{H}$  and  $^{13}\text{C}$  are given in ppm relative to residual signal of the solvent ( $\text{CHCl}_3$ ). Coupling constants are given in Hz. The following abbreviations are used to indicate the multiplicity: s, singlet; d, doublet; t, triplet; q, quartet; m, multiplet; bs, broad signal. High Resolution Mass spectra and X-ray data were obtained from the ILV-UVSQ. Optical rotations are reported as follows:  $[\alpha]_D^{rt}$  ( $c$  in g per 100 mL, solvent). HPLC analysis was performed using chiral AS-H columns with *i*-PrOH/heptane as the eluent. HPLC traces were compared with racemic samples obtained by using DL-proline and benzylamine as catalyst.

Commercial grade reagents and solvents were used without further purification. Chiral primary amine catalyst, 9-Amino(9-deoxy)*epi*-cinchonine **2** and 9-Amino(9-deoxy)*epi*-cinchonidine **7** were prepared from commercially available cinchonine and cinchonidine following the literature procedure.<sup>1</sup> (*rac*)- $\alpha$ -Isopropylbenzylamine and (*rac*)- $\alpha$ -*tert*-butylbenzylamine were obtained following the literature procedure.<sup>2</sup> 2-nitrovinyl naphthalene (Table 1, entry 2), 4-fluoro-nitrostyrene (Table 1, entry 6), 3-chloro-nitrostyrene (Table 1, entry 7) and 3-methoxy-nitrostyrene (Table 1, entry 8) were synthesized following the literature procedure.<sup>3</sup> All other nitroolefines employed are commercially available.

---

<sup>1</sup> Brunner, H.; Bügler, J.; Nuber, B. *Tetrahedron: Asymmetry* **1995**, *6*, 1699

<sup>2</sup> Weiberth, F.J.; Hall, S. S. *J. Org. Chem.* **1987**, *52*, 3901.

<sup>3</sup> Denmark, S. E.; Marcin, L. R. *J. Org. Chem* **1993**, *58*, 3850.

**Experimental procedures****General procedure for the asymmetric organocatalytic Michael/amination cascade sequence of aldehydes.**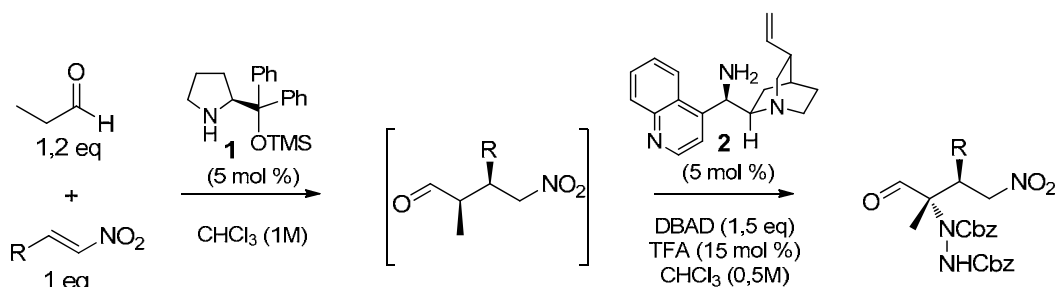

Diphenylprolinol silyl ether **1** (0.05 mmol, 16 mg), nitroalkene (1 mmol) and propionaldehyde (1.2 mmol, 107  $\mu$ L) in  $\text{CHCl}_3$  (1 mL) were stirred at  $0^\circ\text{C}$  until completion of the reaction (monitored by TLC). Then, DBAD (1.5 mmol, 447 mg), 9-Amino(9-deoxy)*epi*-cinchonine **2** (0.05 mmol, 14,7 mg) and a solution of TFA in  $\text{CHCl}_3$  (0.3M, 0.15 mmol, 0.5 mL) were added sequentially at  $0^\circ\text{C}$ . The reaction mixture was stirred at room temperature until completion of the reaction (monitored by TLC). Solvent was removed *in vacuo* and the residue was purified by flash chromatography ( $\text{CHCl}_3$  to  $\text{CH}_2\text{Cl}_2$ ) to yield the desired product.

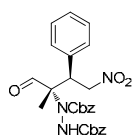

**Dibenzy-1-((2S,3S)-2-methyl-4-nitro-1-oxo-3-phenylbutan-2-yl) hydrazine-1,2-dicarboxylate (5).** The reaction was carried out over 4 hours for the Michael addition and 30 hours for the electrophilic amination.

Yield : 90%; Ee: 96%, the ee was determined on the single diastereoisomer by HPLC analysis on a AS-H column: heptane/*i*-PrOH 9/1, flow rate 0.8 mL/min,  $\lambda = 254 \text{ nm}$  :  $t_R = 46.3 \text{ min.}$ (major),  $t_R = 85.0 \text{ min}$  (minor);  $[\alpha]_D^{20} = -85$  ( $c$  1,  $\text{CH}_2\text{Cl}_2$ ); m.p. =  $109\text{-}111^\circ\text{C}$ ;  $^1\text{H}$  NMR (300 MHz,  $\text{CDCl}_3$ ) Mixture of rotamers :  $\delta$  1.10 (s,  $3\text{H}_{(\text{rot min.})}$ ) 1.21 (s,  $3\text{H}_{(\text{rot maj})}$ ), 4.03-4.13 (m, 1H), 4.64-4.83 (m, 1H), 4.82-5.01 (m, 1H), 5.10-5.26 (m, 4H), 5.55 (s,  $1\text{H}_{(\text{rot min.})}$ ), 5.86 (s,  $1\text{H}_{(\text{rot maj})}$ ), 7.08-7.24 (m, 4H), 7.31-7.42 (m, 11H), 9.35 (s,  $1\text{H}_{(\text{rot min.})}$ ), 9.62 (s,  $1\text{H}_{(\text{rot maj})}$ );  $^{13}\text{C}$  NMR (75 MHz,  $\text{CDCl}_3$ ) Major rotamer :  $\delta$  19.9 (CH<sub>3</sub>), 48.9 (CH), 68.2 (CH<sub>2</sub>), 69.5 (CH<sub>2</sub>), 70.6 (C), 75.9 (CH<sub>2</sub>), 128.3, 128.5, 128.6, 128.7, 128.8, 129.0, 129.2, 129.4 ( $15\text{CH}_{\text{arom}}$ ), 134.7 (C), 134.8 (C), 155.9 (C), 156.6 (C), 195.6 (C); IR :  $\gamma$  3306, 3032, 2942, 1729, 1694, 1506, 1330, 1228, 742, 699; HRMS: ( $m/z$ ) calculated for  $\text{C}_{27}\text{H}_{27}\text{N}_3\text{O}_7\text{Na}$ : 528.1747 ,

found: 528.1767.

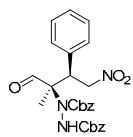

**Dibenzyl-1-((2*R*,3*S*)-2-methyl-4-nitro-1-oxo-3-phenylbutan-2-yl)hydrazine-1,2-dicarboxylate (6).** The reaction was carried out over 4 hours for the Michael addition and 15 hours for the electrophilic amination.

Yield : 76%; Ee: 96%, the ee was determined on the single diastereoisomer by HPLC analysis on a OD-H column: heptane/*i*-PrOH 95/5, flow rate 1 mL/min,  $\lambda = 254$  nm, 30°C :  $t_R = 41.9$  min.(major),  $t_R = 48.8$  min (minor);  $[\alpha]_D^{20} = 73.3$  (*c* 1, CH<sub>2</sub>Cl<sub>2</sub>); <sup>1</sup>H NMR (300 MHz, CDCl<sub>3</sub>) Mixture of rotamers :  $\delta$  1.18 (s, 3H<sub>(rot min.)</sub>) 1.28 (s, 3H<sub>(rot maj)</sub>), 4.45-4.51 (m, 8H), 7.08-7.40 (m, 14H), 9.38 (s, 1H<sub>(rot min.)</sub>), 9.59 (s, 1H<sub>(rot maj)</sub>); <sup>13</sup>C NMR (75 MHz, CDCl<sub>3</sub>) Major rotamer :  $\delta$  14.1 (CH<sub>3</sub>), 44.2 (CH), 68.1 (CH<sub>2</sub>), 69.0 (CH<sub>2</sub>), 69.7 (C), 75.0 (CH<sub>2</sub>), 128.1, 128.3, 128.6, 129.2, (15CH<sub>arom</sub>), 134.9 (C), 135.1 (C), 135.3 (C), 155.6 (C), 156.1 (C), 197.0 (C); IR :  $\gamma$  3302, 3024, 2923, 1731, 1699, 1554, 1341, 1222, 735, 699; HRMS: (*m/z*) calculated for C<sub>27</sub>H<sub>27</sub>N<sub>3</sub>O<sub>7</sub>Na: 528.1747, found: 528.1720.

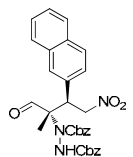

**Dibenzyl-1-((2*S*,3*S*)-2-methyl-4-nitro-1-oxo-3-naphthylbutan-2-yl) hydrazine-1,2-dicarboxylate.** The reaction was carried out over 4 hours for the Michael addition and 65 hours for the electrophilic amination.

Yield : 73%; Ee: 96%, the ee was determined on the single diastereoisomer by HPLC analysis on a AS-H column: heptane/*i*-PrOH 9/1, flow rate 0.8 mL/min,  $\lambda = 254$  nm :  $t_R = 40.5$  min.(major),  $t_R = 71.2$  min (minor);  $[\alpha]_D^{20} = -96.7$  (*c* 1, CH<sub>2</sub>Cl<sub>2</sub>); m.p. = 177-179°C; <sup>1</sup>H NMR (300 MHz, CDCl<sub>3</sub>) Mixture of rotamers :  $\delta$  1.13 (s, 3H<sub>(rot min.)</sub>) 1.24 (s, 3H<sub>(rot maj)</sub>), 4.19-4.28 (m, 1H), 4.75-5.29 (m, 6H), 5.43 (s, 1H<sub>(rot min.)</sub>), 5.81 (s, 1H<sub>(rot maj)</sub>), 7.13-7.19 (m, 3H), 7.30-7.62 (m, 11H), 7.74-7.84 (m, 3H), 9.37 (s, 1H<sub>(rot min.)</sub>), 9.65 (s, 1H<sub>(rot maj)</sub>); <sup>13</sup>C NMR (75 MHz, CDCl<sub>3</sub>) Major rotamer :  $\delta$  20.1 (CH<sub>3</sub>), 49.2 (CH), 68.3 (CH<sub>2</sub>), 69.6 (CH<sub>2</sub>), 70.8 (C), 76.2 (CH<sub>2</sub>), 125.0, 126.7, 126.8, 127.7, 127.8, 128.3, 128.4, 128.6, 128.7, 128.8, 128.9, 129.2 (17 CH<sub>arom</sub>), 132.0 (C), 132.9 (C), 133.2 (C), 134.7 (C), 134.8 (C), 156.0 (C), 156.7 (C), 195.8 (C); IR :  $\gamma$  3329, 2840, 1748, 1716, 1546, 1495, 1345, 1223, 749, 730, 691; HRMS: (*m/z*) calculated for C<sub>31</sub>H<sub>29</sub>N<sub>3</sub>O<sub>7</sub>Na: 578.1903, found: 578.1890.

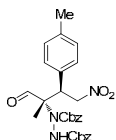

**Dibenzyl-1-((2*S*,3*S*)-2-methyl-4-nitro-1-oxo-3-tolylbutan-2-yl) hydrazine-1,2-dicarboxylate.** The reaction was carried out over 6 hours for the Michael addition and 25 hours for the electrophilic amination.

Yield : 85%; Ee: 96%, the ee was determined on the single diastereoisomer by HPLC analysis on a OD-H column: heptane/*i*-PrOH 95/5, flow rate 1 mL/min,  $\lambda = 254$  nm :  $t_R = 41.6$  min.(major),  $t_R = 54.7$  min (minor);  $[\alpha]_D^{20} = -93$  ( $c$  1,  $\text{CH}_2\text{Cl}_2$ ); m.p. = 129-130°C;  $^1\text{H}$  NMR (300 MHz,  $\text{CDCl}_3$ ) Mixture of rotamers :  $\delta$  1.08 (s,  $3\text{H}_{(\text{rot min.})}$ ) 1.20 (s,  $3\text{H}_{(\text{rot maj})}$ ), 2.31 (s, 3H), 3.97-4.07 (m, 1H), 4.58-4.70 (m, 1H), 4.82-5.01 (m, 1H), 5.07-5.25 (m, 4H), 5.47 (s,  $1\text{H}_{(\text{rot min.})}$ ), 5.83 (s,  $1\text{H}_{(\text{rot maj})}$ ), 6.90-6.97 (m, 2H), 7.10-7.25 (m, 4H), 7.33-7.41 (8H), 9.34 (s,  $1\text{H}_{(\text{rot min.})}$ ), 9.61 (s,  $1\text{H}_{(\text{rot maj})}$ );  $^{13}\text{C}$  NMR (75 MHz,  $\text{CDCl}_3$ ) Major rotamer :  $\delta$  20.0 ( $\text{CH}_3$ ), 21.0 ( $\text{CH}_3$ ), 48.7 (CH), 68.3 ( $\text{CH}_2$ ), 69.5 ( $\text{CH}_2$ ), 70.7 (C), 76.1 ( $\text{CH}_2$ ), 128.3, 128.4, 128.7, 128.9, 130.0, 130.1 (14  $\text{CH}_{\text{arom}}$ ), 131.6 (C), 134.7 (C), 134.9 (C), 138.4 (C), 155.9 (C), 156.6 (C), 195.8 (C); IR :  $\gamma$  3345, 3023, 2954, 1740, 1685, 1548, 1348, 1227, 753, 729; HRMS: ( $m/z$ ) calculated for  $\text{C}_{28}\text{H}_{29}\text{N}_3\text{O}_7\text{Na}$ : 542.1903 , found: 542.1883.

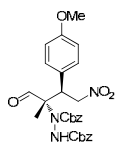

**Dibenzyl-1-((2*S*,3*S*)-2-methyl-4-nitro-1-oxo-3-(4-methoxyphenyl)butan-2-yl) hydrazine-1,2-dicarboxylate.** The reaction was carried out over 8 hours for the Michael addition and 22 hours for the electrophilic amination.

Yield : 85%; Ee: 97%, the ee was determined on the single diastereoisomer by HPLC analysis on a AS-H column: heptane/*i*-PrOH 9/1, flow rate 0.8 mL/min,  $\lambda = 254$  nm :  $t_R = 74.7$  min.(major),  $t_R = 117.2$  min (minor);  $[\alpha]_D^{20} = -87.8$  ( $c$  1,  $\text{CH}_2\text{Cl}_2$ ); m.p. = 120-122°C;  $^1\text{H}$  NMR (300 MHz,  $\text{CDCl}_3$ ) Mixture of rotamers :  $\delta$  1.08 (s,  $3\text{H}_{(\text{rot min.})}$ ) 1.20 (s,  $3\text{H}_{(\text{rot maj})}$ ), 3.78 (s, 3H), 3.98-4.05 (m, 1H), 4.56-4.68 (m, 1H), 4.82-5.25 (m, 5H), 5.46 (s,  $1\text{H}_{(\text{rot min.})}$ ), 5.81 (s,  $1\text{H}_{(\text{rot maj})}$ ), 6.81-7.00 (m, 4H), 7.15-7.25 (m, 2H), 7.33-7.41 (m, 8H), 9.34 (s,  $1\text{H}_{(\text{rot min.})}$ ), 9.61 (s,  $1\text{H}_{(\text{rot maj})}$ );  $^{13}\text{C}$  NMR (75 MHz,  $\text{CDCl}_3$ ) Major rotamer :  $\delta$  19.9 ( $\text{CH}_3$ ), 48.2 (CH), 55.1 ( $\text{CH}_3$ ), 68.2 ( $\text{CH}_2$ ), 69.4 ( $\text{CH}_2$ ), 70.7 (C), 76.2 ( $\text{CH}_2$ ), 114.5 (2CH), 126.2 (C), 128.2, 128.3 , 128.5, 128.6, 128.7, 128.8, 129.8 (12  $\text{CH}_{\text{arom}}$ ), 134.7 (C), 134.9 (C), 155.9 (C), 156.6 (C), 159.4 (C), 195.9 (C); IR :  $\gamma$  3305, 3031, 2958, 1727, 1703, 1549, 1252, 901, 727; HRMS: ( $m/z$ ) calculated for  $\text{C}_{28}\text{H}_{29}\text{N}_3\text{O}_8\text{Na}$ : 558.1852, found: 558.1840.

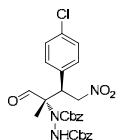

**Dibenzyl-1-((2*S*,3*S*)-2-methyl-4-nitro-1-oxo-3-(4-chlorophenyl)butan-2-yl)hydrazine-1,2-dicarboxylate.** The reaction was carried out over 5 hours for the Michael addition and 70 hours for the electrophilic amination.

Yield : 85%; Ee: 98%, the ee was determined on the single diastereoisomer by HPLC analysis on a AS-H column: heptane/*i*-PrOH 9/1, flow rate 0.8 mL/min,  $\lambda = 254$  nm :  $t_R = 43.1$  min.(major),  $t_R = 58.3$  min (minor);  $[\alpha]_D^{20} = -76$  (*c* 1, CH<sub>2</sub>Cl<sub>2</sub>); m.p. = 146-148°C; <sup>1</sup>H NMR (300 MHz, CDCl<sub>3</sub>) Mixture of rotamers :  $\delta$  1.08 (s, 3H<sub>(rot min.)</sub>) 1.19 (s, 3H<sub>(rot maj)</sub>), 4.02-4.11 (m, 1H), 4.57-4.70 (m, 1H), 4.84-5.24 (m, 5H), 5.73 (s, 1H<sub>(rot min.)</sub>), 5.96 (s, 1H<sub>(rot maj)</sub>), 6.97-7.42 (m, 14H), 9.32 (s, 1H<sub>(rot min.)</sub>), 9.61 (s, 1H<sub>(rot maj)</sub>); <sup>13</sup>C NMR (75 MHz, CDCl<sub>3</sub>) Major rotamer :  $\delta$  19.9 (CH<sub>3</sub>), 48.4 (CH), 68.4 (CH<sub>2</sub>), 69.6 (CH<sub>2</sub>), 70.4 (C), 75.9 (CH<sub>2</sub>), 128.4, 128.6, 128.7, 128.8, 128.9, 129.4, 130.1 (14 CH<sub>arom</sub>), 133.1 (C), 133.4 (C), 134.5 (C), 134.7 (C), 156.1 (C), 156.6 (C), 195.4 (C); IR :  $\gamma$  3332, 3031, 2958, 1723, 1697, 1551, 1334, 1228, 728; HRMS: (*m/z*) calculated for C<sub>27</sub>H<sub>26</sub>ClN<sub>3</sub>O<sub>7</sub>Na: 562.1357, found: 562.1364.

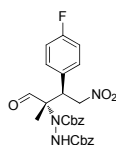

**Dibenzyl-1-((2*S*,3*S*)-2-methyl-4-nitro-1-oxo-3-(4-fluorophenyl)butan-2-yl)hydrazine-1,2-dicarboxylate.** The reaction was carried out over 4 hours for the Michael addition and 140 hours for the electrophilic amination.

Yield : 81%; Ee: 97%, the ee was determined on the single diastereoisomer by HPLC analysis on a AS-H column: heptane/*i*-PrOH 9/1, flow rate 0.8 mL/min,  $\lambda = 254$  nm :  $t_R = 33.0$  min.(major),  $t_R = 43.1$  min (minor);  $[\alpha]_D^{20} = -76.3$  (*c* 1, CH<sub>2</sub>Cl<sub>2</sub>); m.p. = 136-138°C; <sup>1</sup>H NMR (300 MHz, CDCl<sub>3</sub>) Mixture of rotamers :  $\delta$  1.09 (s, 3H<sub>(rot min.)</sub>) 1.20 (s, 3H<sub>(rot maj)</sub>), 4.05-4.11 (m, 1H), 4.58-4.71 (m, 1H), 4.85-5.24 (m, 5H), 5.67 (s, 1H<sub>(rot min.)</sub>), 5.92 (s, 1H<sub>(rot maj)</sub>), 6.98-7.40 (m, 14H), 9.34 (s, 1H<sub>(rot min.)</sub>), 9.62 (s, 1H<sub>(rot maj)</sub>); <sup>13</sup>C NMR (75 MHz, CDCl<sub>3</sub>) Major rotamer :  $\delta$  19.9 (CH<sub>3</sub>), 48.4 (CH), 68.5 (CH<sub>2</sub>), 69.7 (CH<sub>2</sub>), 70.7 (C), 76.2 (CH<sub>2</sub>), 116.3 (d, J = 21 Hz, 2CH), 128.4, 128.7, 128.8, 129.0 (10 CH<sub>arom</sub>), 130.6 (d, J = 7.6 Hz, 2CH), 130.7 (d, J = 3.2 Hz, C), 134.7 (C), 134.9 (C), 156.2 (C), 156.7 (C), 162.5 (d, J = 247 Hz, C), 195.6 (C); IR :  $\gamma$  3321, 2836, 1743, 1720, 1546, 1408, 1345, 1219, 749, 722, 698; HRMS: (*m/z*) calculated for C<sub>27</sub>H<sub>26</sub>FN<sub>3</sub>O<sub>7</sub>Na: 546.1652, found: 546.1642.

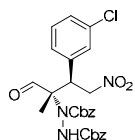

**Dibenzy-1-((2S,3S)-2-methyl-4-nitro-1-oxo-3-(3-chlorophenyl)butan-2-yl)hydrazine-1,2-dicarboxylate.** The reaction was carried out over 4 hours for the Michael addition and 90 hours for the electrophilic amination.

Yield : 85%; Ee: 98%, the ee was determined on the single diastereoisomer by HPLC analysis on a AS-H column: heptane/*i*-PrOH 9/1, flow rate 0.8 mL/min,  $\lambda = 254$  nm :  $t_R = 30.6$  min.(major),  $t_R = 46.0$  min (minor);  $[\alpha]_D^{20} = -76.5$  (*c* 1, CH<sub>2</sub>Cl<sub>2</sub>); m.p. = 180-181°C; <sup>1</sup>H NMR (300 MHz, CDCl<sub>3</sub>) Mixture of rotamers :  $\delta$  1.09 (s, 3H<sub>(rot min.)</sub>) 1.21 (s, 3H<sub>(rot maj)</sub>), 4.00-4.09 (m, 1H), 4.52-4.66 (m, 1H), 4.82-5.25 (m, 5H), 5.51 (s, 1H<sub>(rot min.)</sub>), 5.84 (s, 1H<sub>(rot maj)</sub>), 6.93-7.40 (m, 14H), 9.30 (s, 1H<sub>(rot min.)</sub>), 9.59 (s, 1H<sub>(rot maj)</sub>); <sup>13</sup>C NMR (75 MHz, CDCl<sub>3</sub>) Major rotamer :  $\delta$  20.0 (CH<sub>3</sub>), 48.8 (CH), 68.5 (CH<sub>2</sub>), 69.7 (CH<sub>2</sub>), 70.5 (C), 75.9 (CH<sub>2</sub>), 126.4 (2CH), 128.4, 128.7, 128.8, 128.9, 129.0, 129.7 (11 CH<sub>arom</sub>), 130.4 (CH), 134.6 (C), 134.8 (C), 135.1 (C), 137.2 (C), 156.1 (C), 156.6 (C), 195.3 (C); IR :  $\gamma$  3305, 2832, 1748, 1732, 1672, 1558, 1412, 1345, 1227, 753, 738, 694; HRMS: (*m/z*) calculated for C<sub>27</sub>H<sub>26</sub>ClN<sub>3</sub>O<sub>7</sub>Na: 562.1357, found: 562.1332.

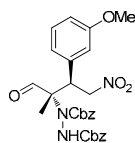

**Dibenzy-1-((2S,3S)-2-methyl-4-nitro-1-oxo-3-(3-methoxyphenyl)butan-2-yl)hydrazine-1,2-dicarboxylate.** The reaction was carried out over 4 hours for the Michael addition and 88 hours for the electrophilic amination.

Yield : 76%; Ee: 96%, the ee was determined on the single diastereoisomer by HPLC analysis on a AS-H column: heptane/*i*-PrOH 9/1, flow rate 0.8 mL/min,  $\lambda = 254$  nm, 35°C :  $t_R = 32.0$  min.(major),  $t_R = 66.3$  min (minor);  $[\alpha]_D^{20} = -76.2$  (*c* 1, CH<sub>2</sub>Cl<sub>2</sub>); m.p. = 98-100°C; <sup>1</sup>H NMR (300 MHz, CDCl<sub>3</sub>) Mixture of rotamers :  $\delta$  1.12 (s, 3H<sub>(rot min.)</sub>) 1.24 (s, 3H<sub>(rot maj)</sub>), 3.74 (s, 3H), 4.00-4.09 (m, 1H), 4.60-4.73 (m, 1H), 4.84-5.26 (m, 5H), 5.62 (s, 1H<sub>(rot min.)</sub>), 5.94 (s, 1H<sub>(rot maj)</sub>), 6.60-6.86 (m, 3H), 7.18-7.40 (m, 11H), 9.35 (s, 1H<sub>(rot min.)</sub>), 9.62 (s, 1H<sub>(rot maj)</sub>); <sup>13</sup>C NMR (75 MHz, CDCl<sub>3</sub>) Major rotamer :  $\delta$  20.0 (CH<sub>3</sub>), 49.0 (CH), 55.1 (CH<sub>3</sub>) 68.5 (CH<sub>2</sub>), 69.5 (CH<sub>2</sub>), 70.6 (C), 76.0 (CH<sub>2</sub>), 113.7 (CH), 116.0 (CH), 120.2 (CH) 128.3, 128.6, 128.7, 128.8, 130.2 (11 CH<sub>arom</sub>), 134.7 (C), 134.9 (C), 136.4 (C), 156.0 (C), 156.6 (C), 159.9 (C), 195.6 (C); IR :  $\gamma$  3314, 2836, 1744, 1680, 1550, 1451, 1341, 1219, 749, 726, 695; HRMS: (*m/z*) calculated for C<sub>28</sub>H<sub>29</sub>N<sub>3</sub>O<sub>8</sub>Na: 558.1852, found: 558.1833.

**Procedure for the oxidation of aldehyde 5**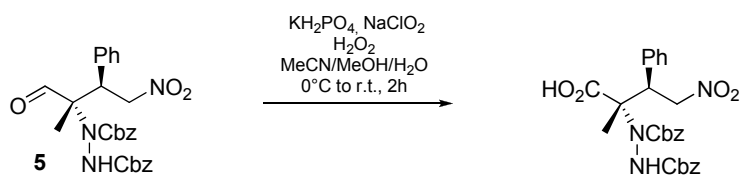

To a solution of aldehyde **5** (190 mg, 0.38 mmol) in  $\text{CH}_3\text{OH}/\text{CH}_3\text{CN}/\text{H}_2\text{O}$  (1/2/1, 8 mL) was added  $\text{KH}_2\text{PO}_4$  (200 mg, 1.47 mmol),  $\text{NaClO}_2$  (140 mg, 1.30 mmol) and 30%  $\text{H}_2\text{O}_2$  (1.4 mL) at  $0^\circ\text{C}$ . The mixture was allowed warm to room temperature and stirred 2 hours. The solution was acidified with 2 M  $\text{HCl}$  till  $\text{pH} = 3$ . Saturated  $\text{Na}_2\text{SO}_3$  aqueous (1 mL) was added at  $0^\circ\text{C}$  and the mixture was acidified with 2 M  $\text{HCl}$  till  $\text{pH} = 3$  again. The aqueous phase was extracted by ethyl acetate. The combined organic layer was washed by brine and dried over  $\text{MgSO}_4$ . The solvent was removed *in vacuo* and the residue was purified by flash chromatography on silica gel ( $\text{CH}_2\text{Cl}_2/\text{MeOH}$  96/4) to give the corresponding carboxylic acid as a colorless oil (160 mg, 83 %).

Yield : 83%;  $[\alpha]_{\text{D}}^{20} = -161.5$  ( $c$  1,  $\text{CH}_2\text{Cl}_2$ );  $^1\text{H}$  NMR (300 MHz,  $\text{CDCl}_3$ ):  $\delta$  1.34 (s, 3H), 4.17 (dd,  $J = 11.7$  and  $2.8$  Hz, 1H), 4.70 (t,  $J = 12.7$  Hz, 1H), 5.07-5.26 (m, 4H), 5.44-5.48 (d,  $J = 12.7$  Hz, 1H), 6.28 (s, 1H), 7.03-7.05 (m, 2H), 7.25-7.41 (m, 13H);  $^{13}\text{C}$  NMR (75 MHz,  $\text{CDCl}_3$ ):  $\delta$  24.0 ( $\text{CH}_3$ ), 51.2 (CH), 68.8 ( $\text{CH}_2$ ), 70.0 ( $\text{CH}_2$ ), 70.2 ( $\text{CH}_2$ ), 77.4 (C), 128.7, 128.8, 128.9, 129.0, 129.2, 129.3, 129.4, (15 $\text{CH}_{\text{arom}}$ ), 134.0 (C), 134.5 (C), 135.4 (C), 155.6 (C), 159.8 (C), 171.4 (C); IR :  $\gamma$  3286, 3065, 2950, 1716, 1550, 1495, 1451, 1262, 734, 690; HRMS: ( $m/z$ ) calculated for  $\text{C}_{27}\text{H}_{27}\text{N}_3\text{O}_8\text{Na}$ : 544.1696, found: 544.1672.



**Procedure for the synthesis of compound 8**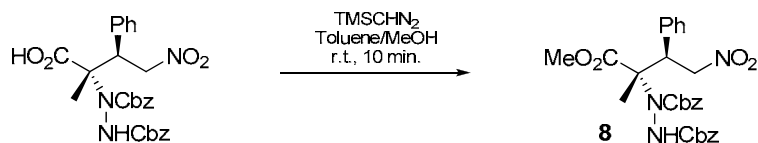

To a solution of carboxylic acid (52 mg, 0.1 mmol) in toluene/MeOH (2/1, 1 mL) was added dropwise a solution of TMSCHN<sub>2</sub> (2M in hexanes, 0.1 mL, 0.2 mmol) at room temperature. The solution was stirred 10 minutes and the excess of TMSCHN<sub>2</sub> was quenched with few drops of AcOH. The solvent was removed *in vacuo* and the residue was purified by flash chromatography on silica gel (Pentane/EtOAc 4/1) to afford the corresponding ester **8** as a colorless oil (32 mg, 60 %).

Yield : 60%;  $[\alpha]_D^{20} = -89.0$  (*c* 1, CH<sub>2</sub>Cl<sub>2</sub>); <sup>1</sup>H NMR (300 MHz, CDCl<sub>3</sub>): δ 1.53 (s, 3H), 3.63 (s, 3H), 4.02-4.21 (m, 1H), 4.72-5.43 (m, 6H), 5.96 (s, 1H), 7.05-7.12 (m, 2H), 7.21-7.41 (m, 13H); <sup>13</sup>C NMR (75 MHz, CDCl<sub>3</sub>) Major rotamer : δ 22.3 (CH<sub>3</sub>), 50.8 (CH), 52.9 (CH<sub>3</sub>), 68.2 (CH<sub>2</sub>), 68.5 (CH<sub>2</sub>), 69.0 (CH<sub>2</sub>), 76.6 (C), 128.2, 128.4, 128.6, 128.6, 128.8, 128.8, 129.2 (15CH<sub>arom</sub>), 135.1 (C), 135.3 (C), 135.4 (C), 155.9 (C), 155.9 (C), 172.4 (C); IR : γ 3294, 3025, 2939, 1708, 1542, 1451, 1215, 738, 698; HRMS: (*m/z*) calculated for C<sub>28</sub>H<sub>29</sub>N<sub>3</sub>O<sub>8</sub>Na: 558.1852, found: 558.1831.

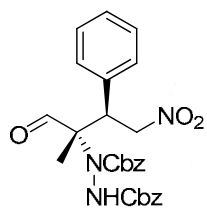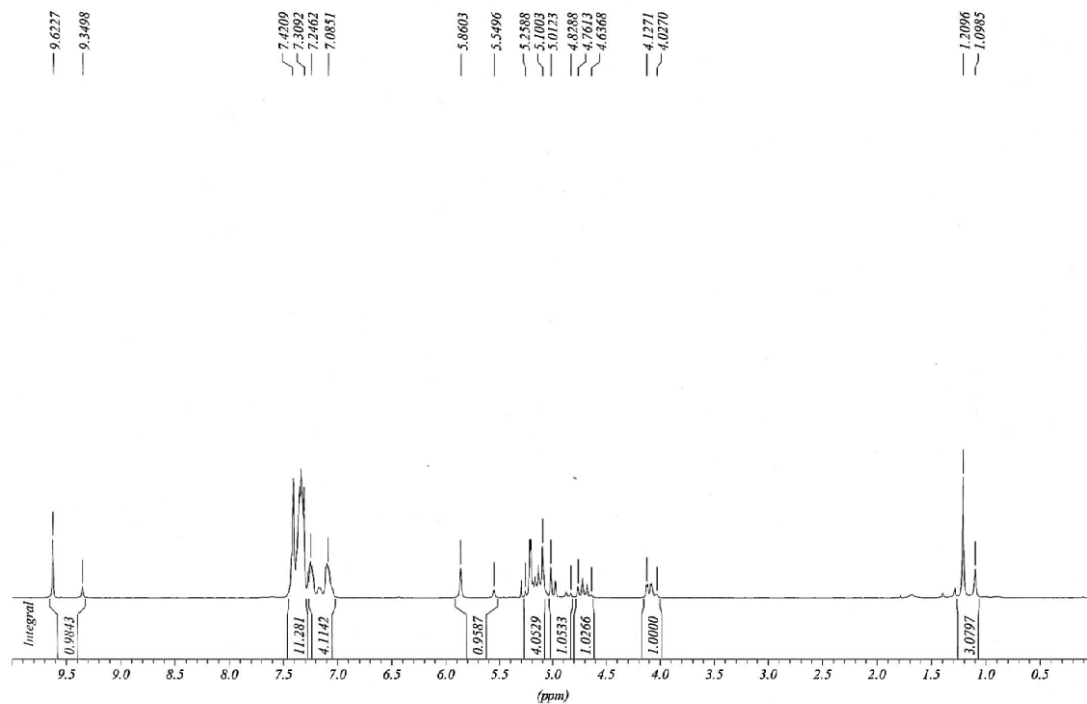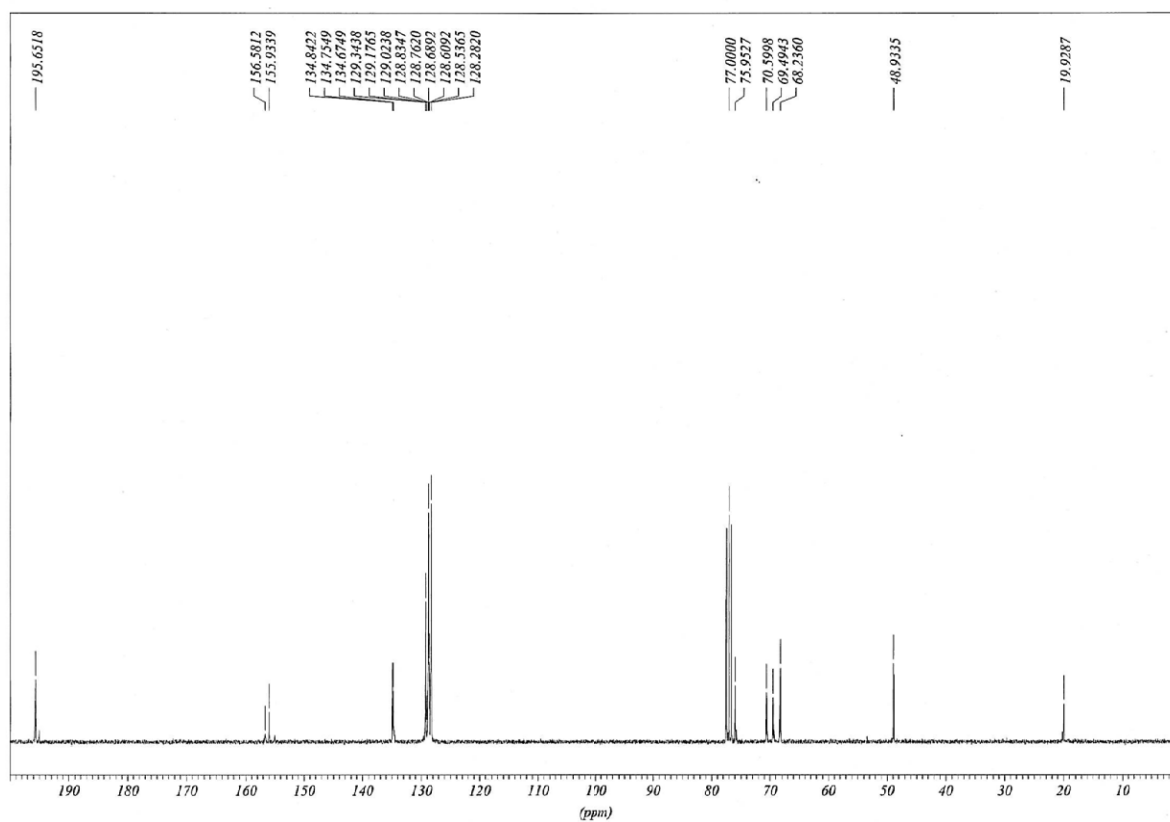

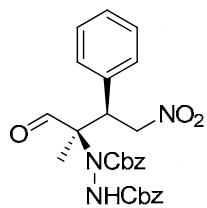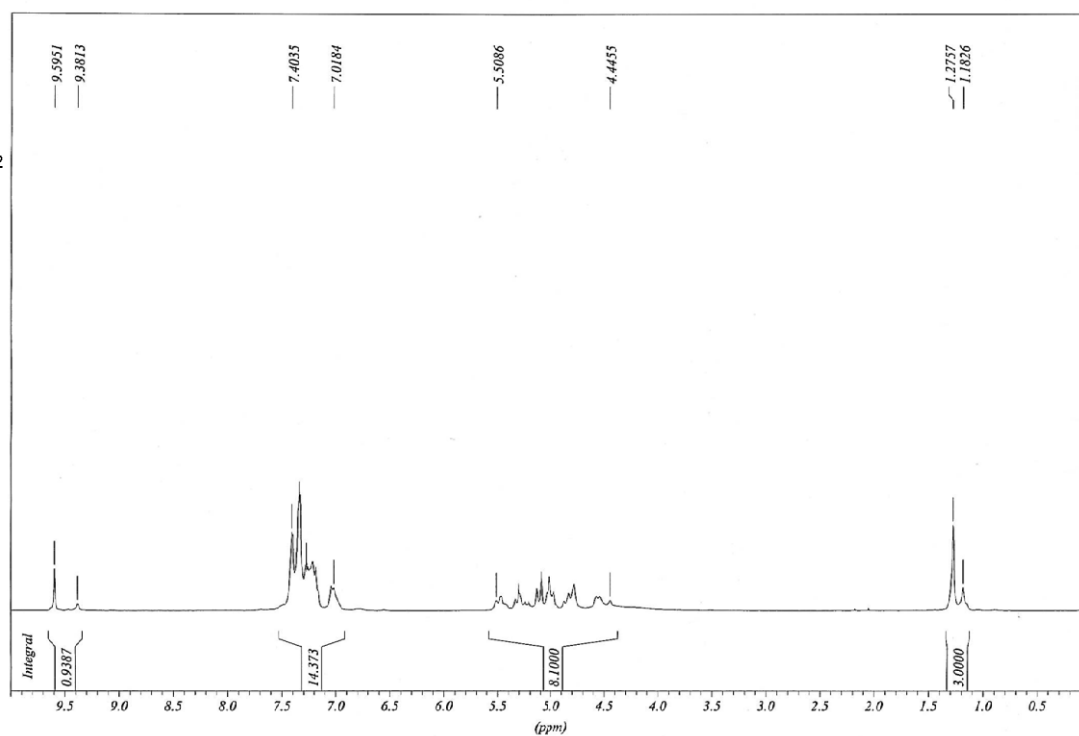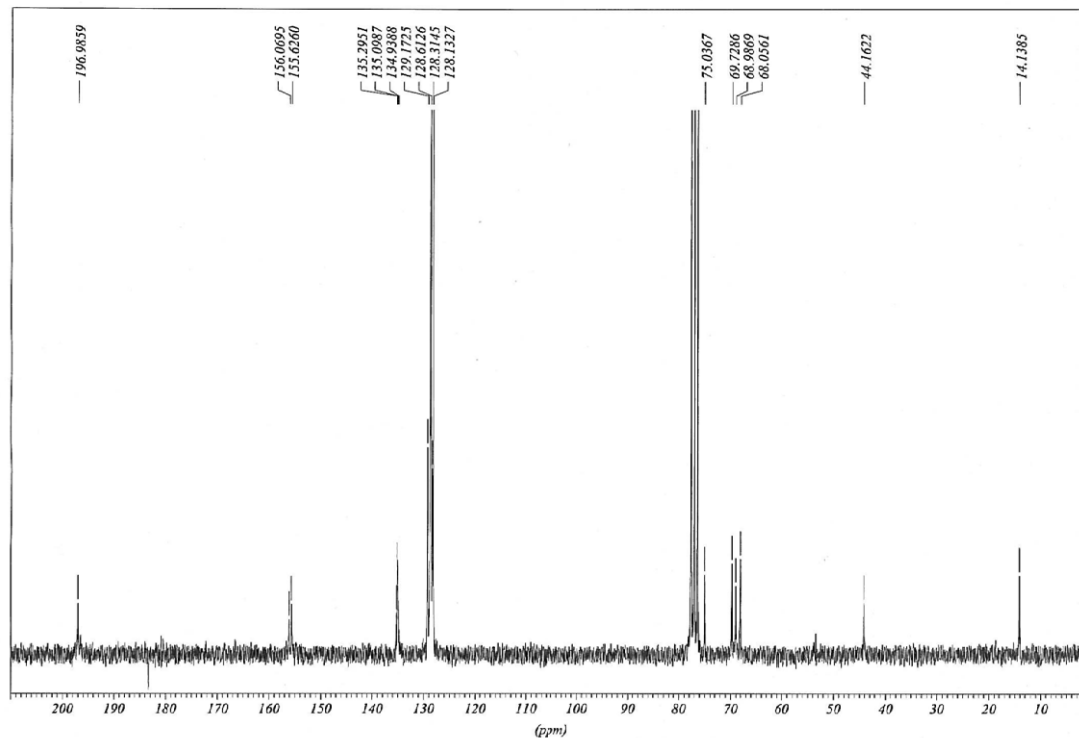

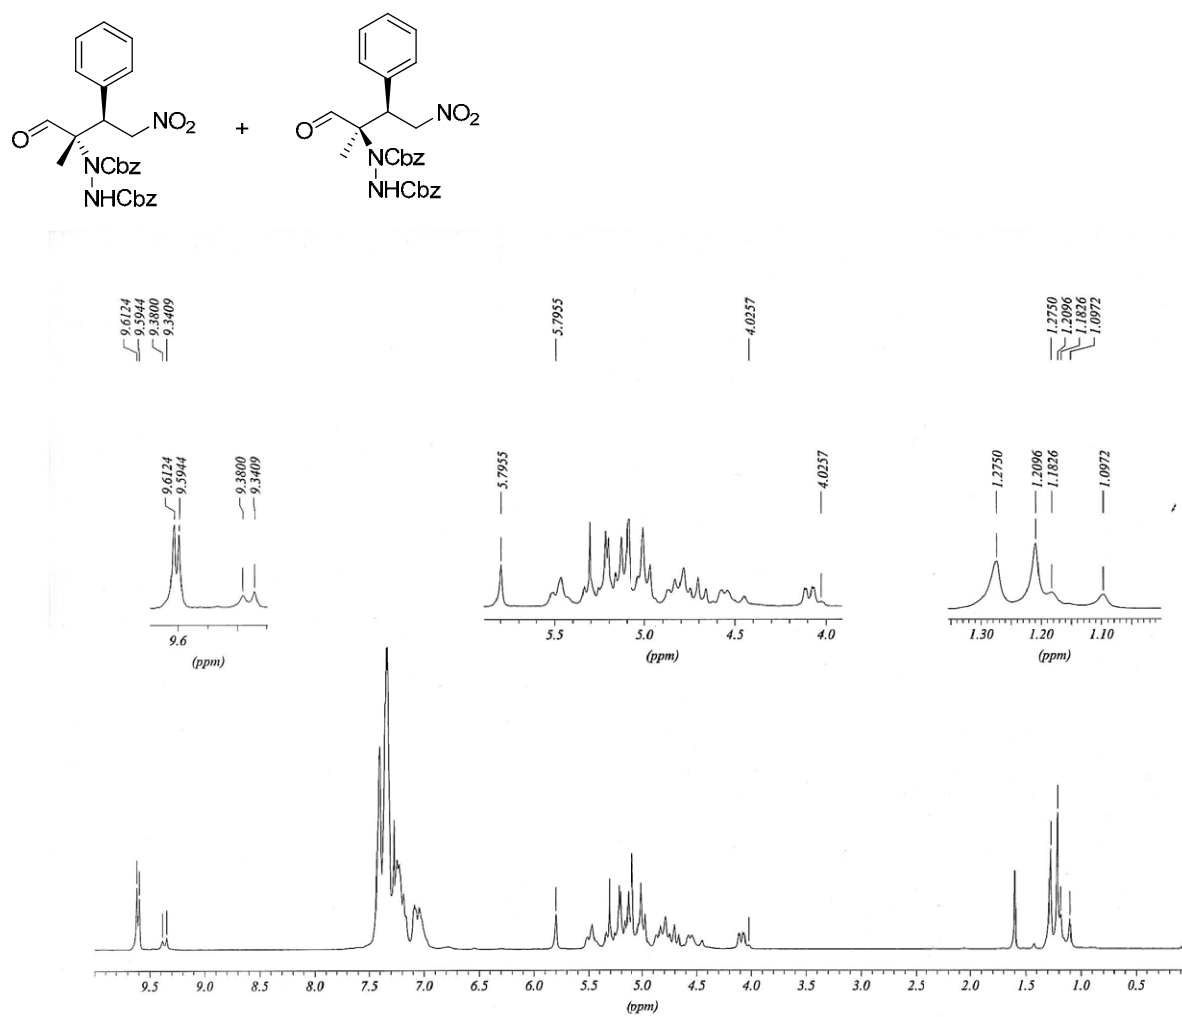

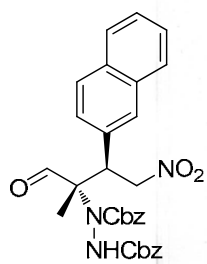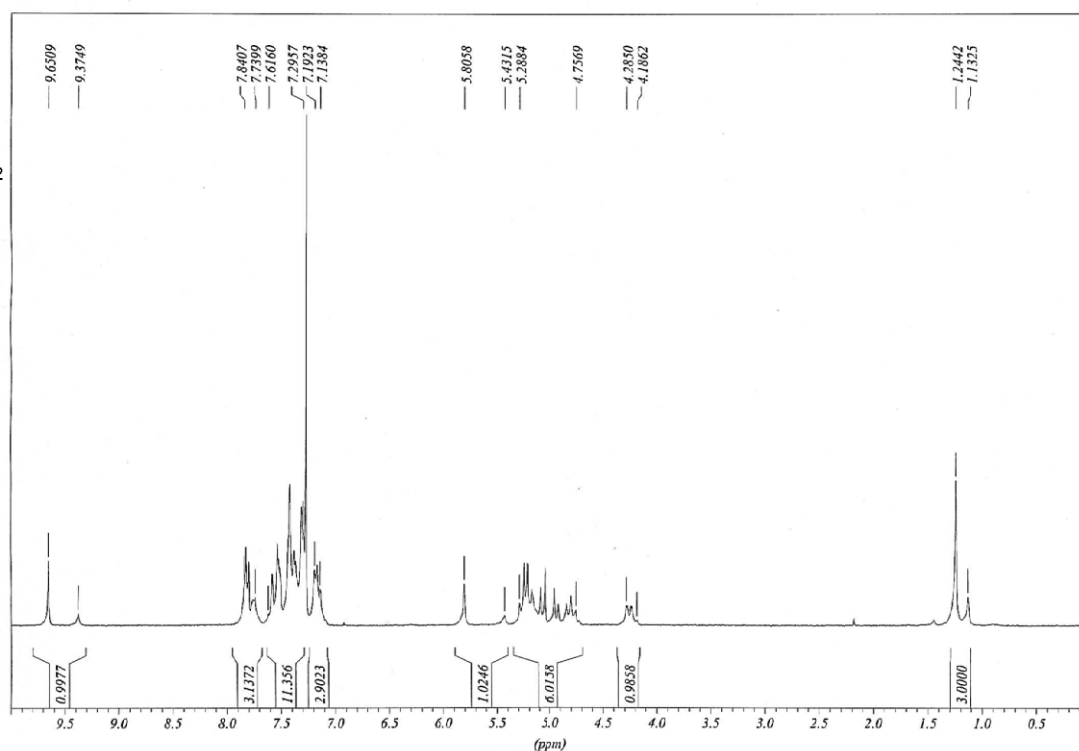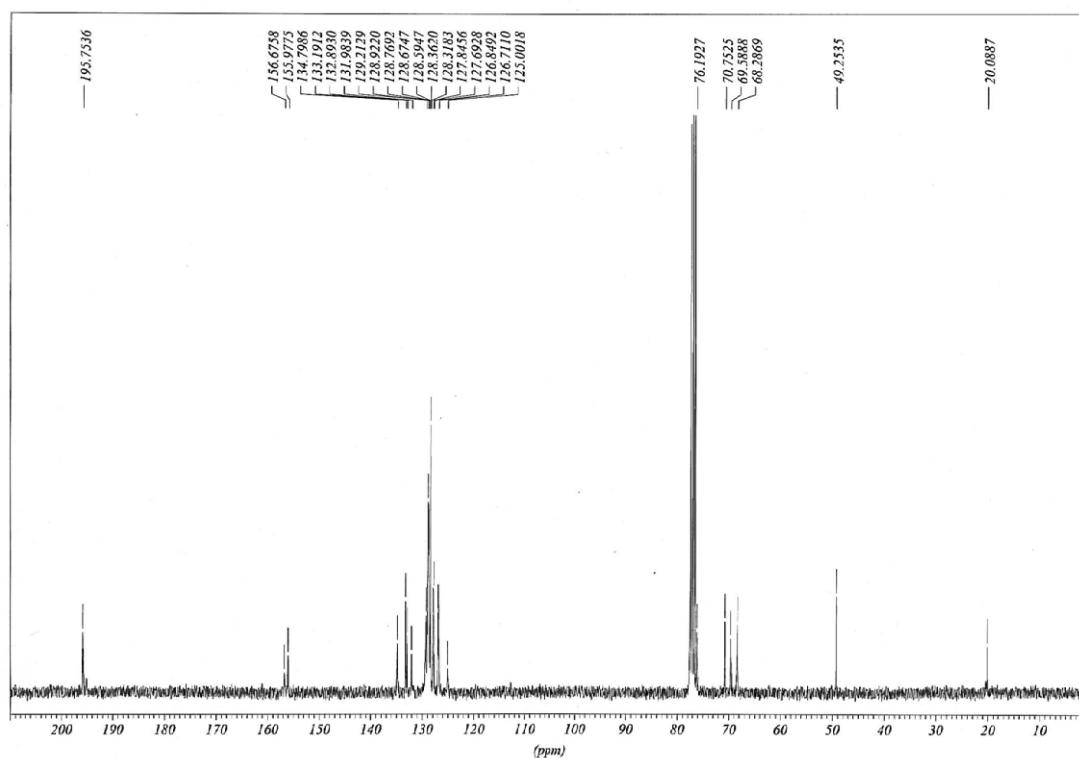

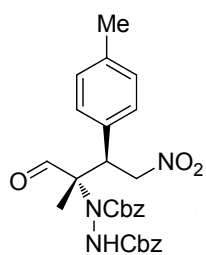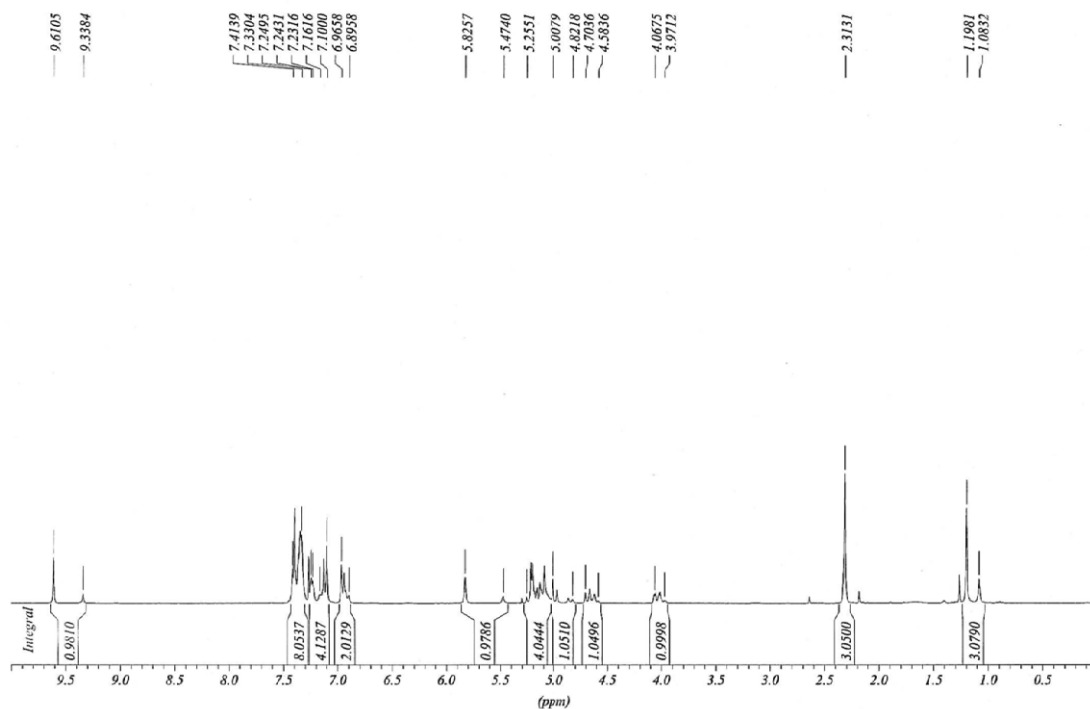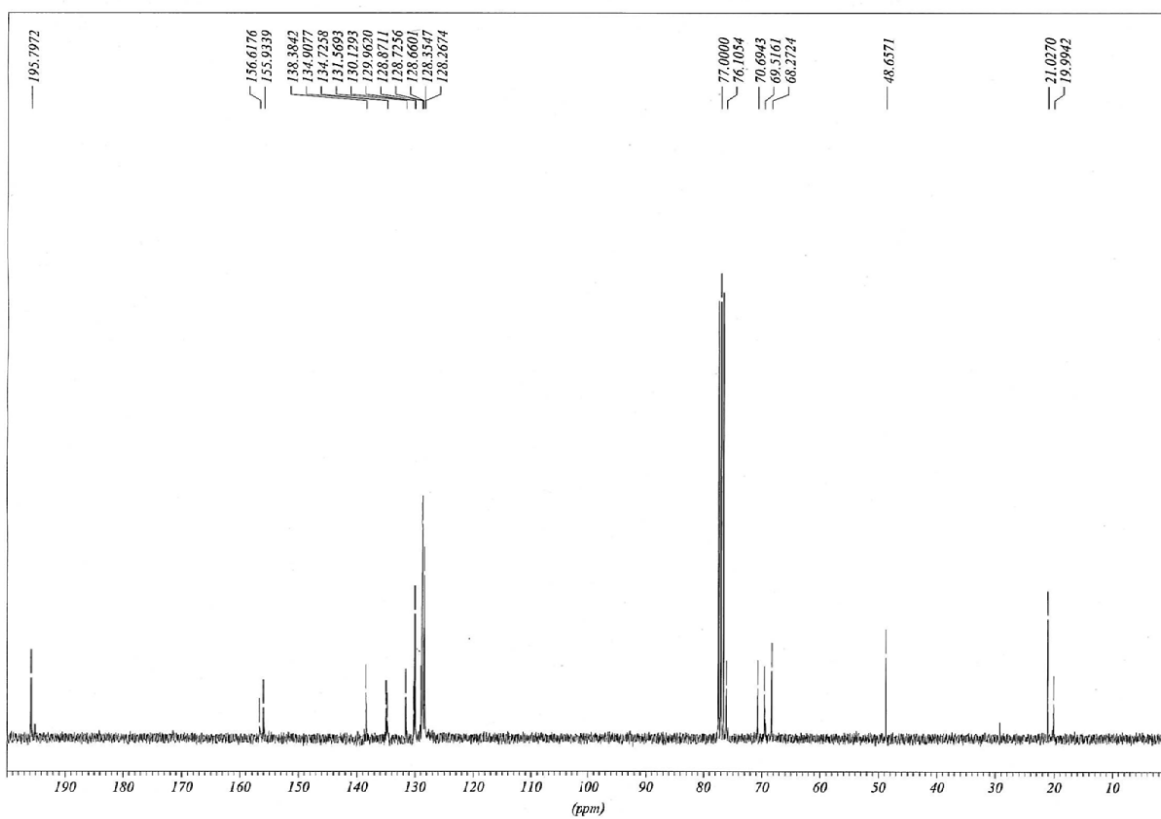

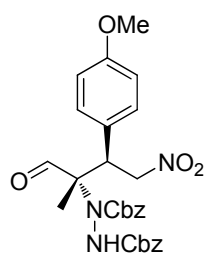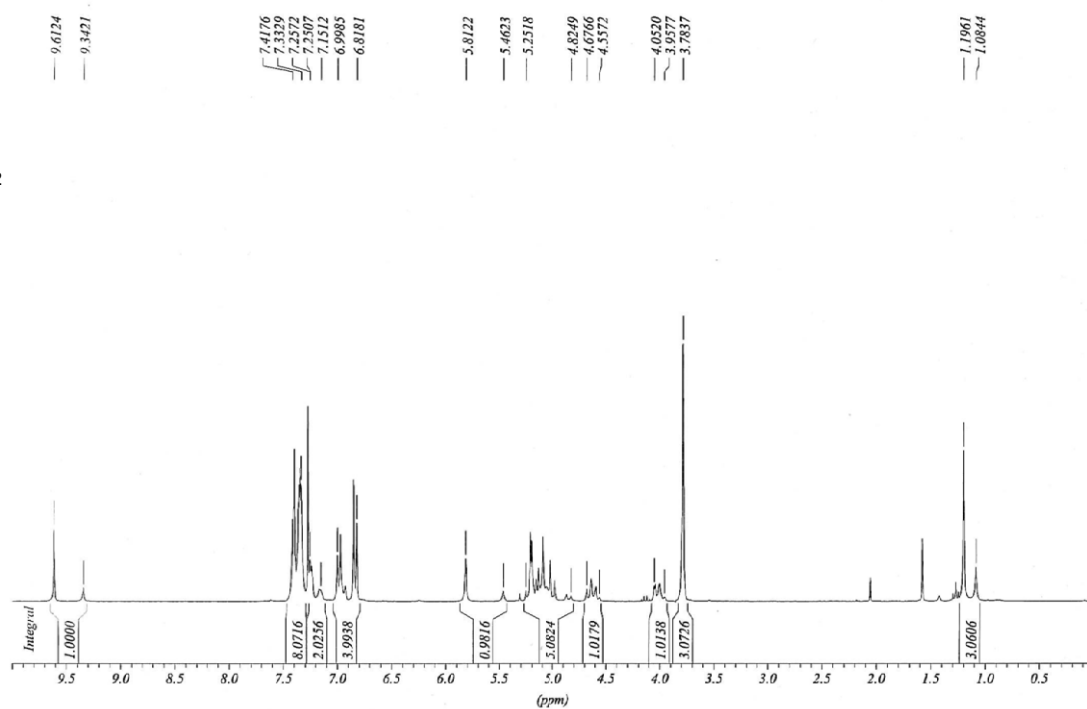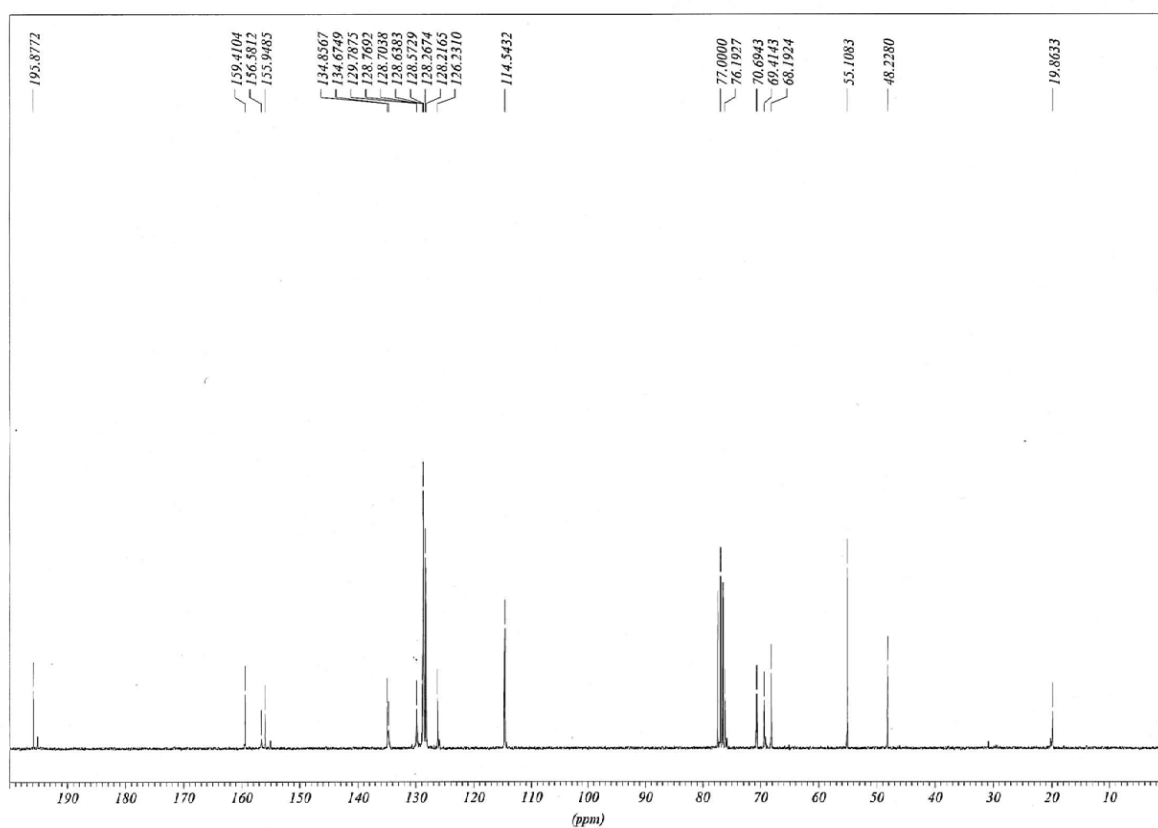

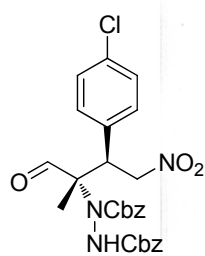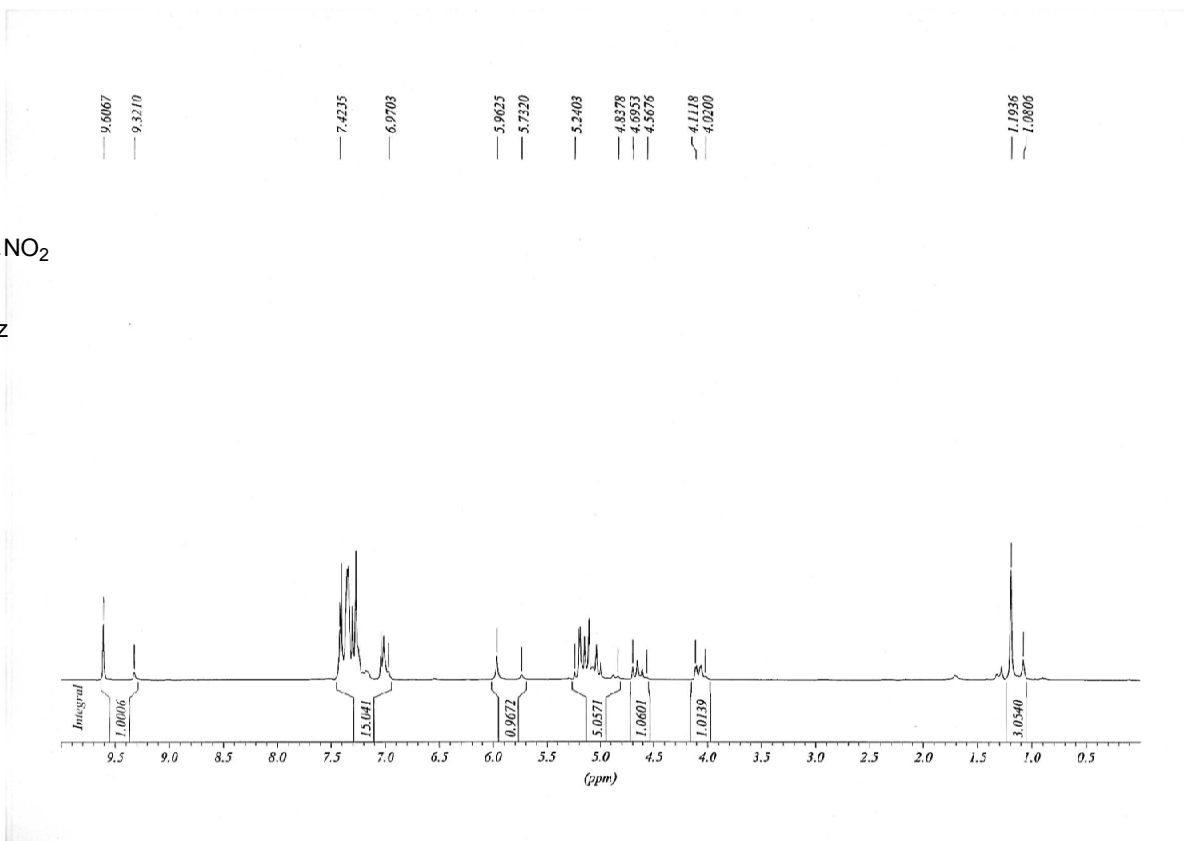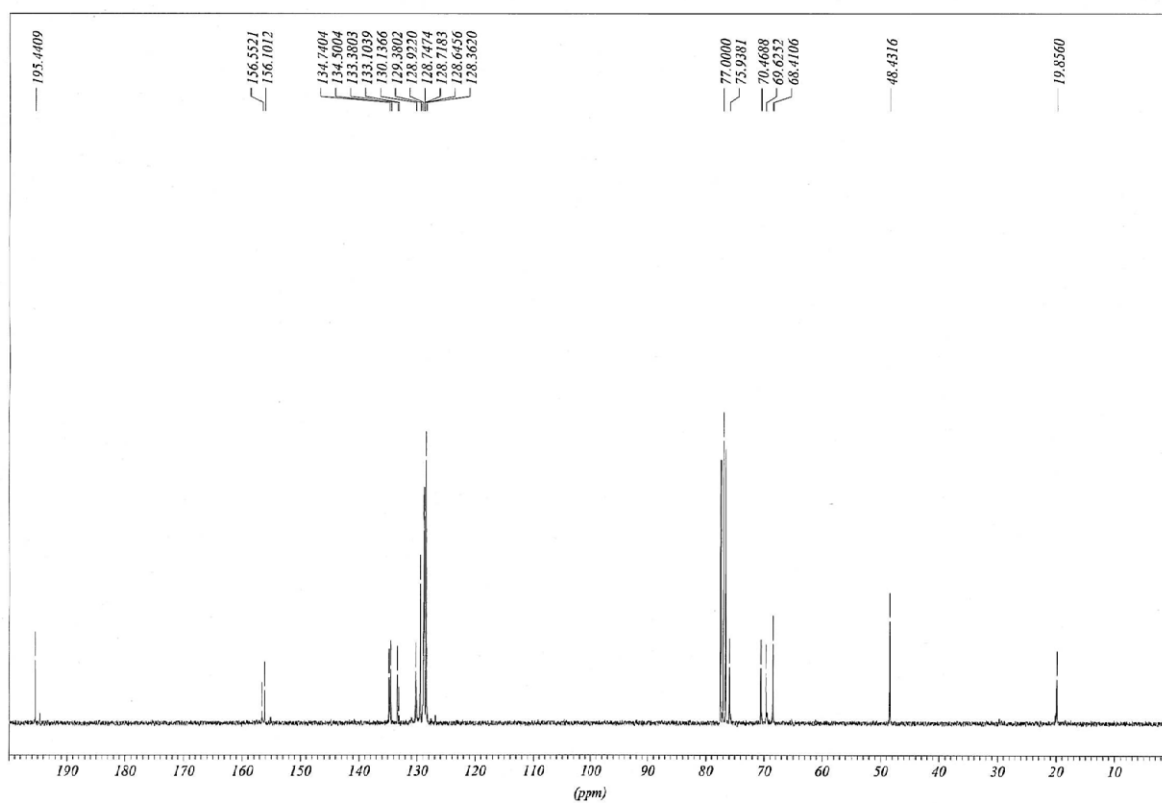



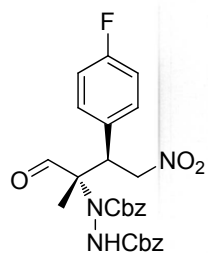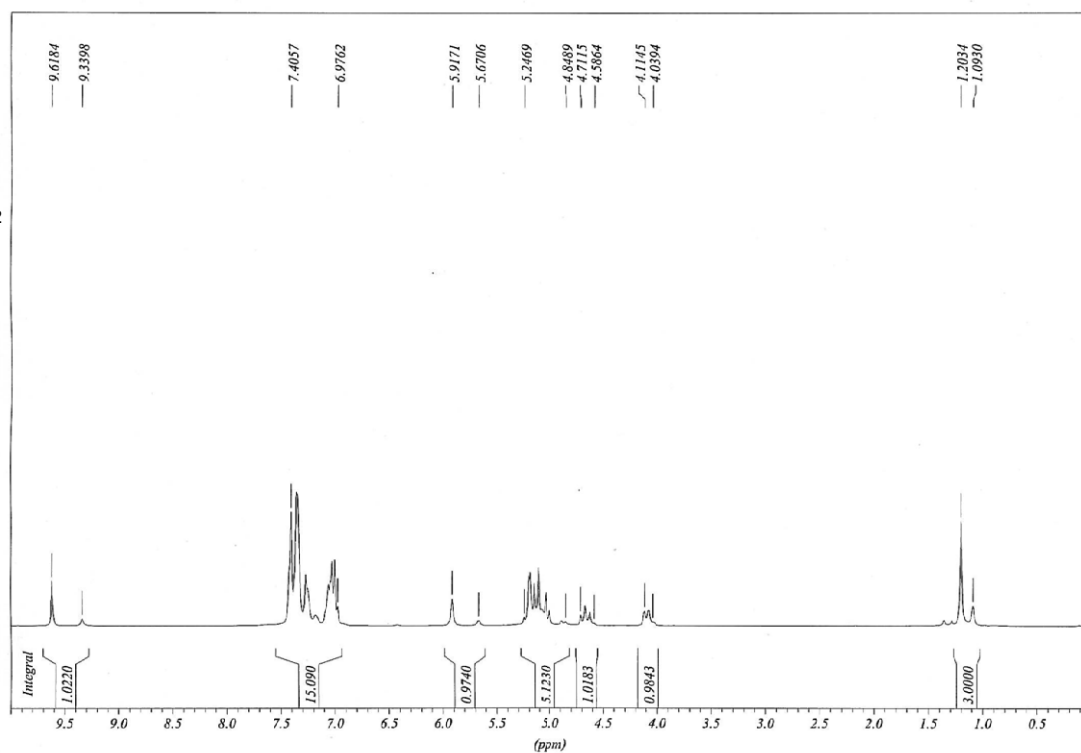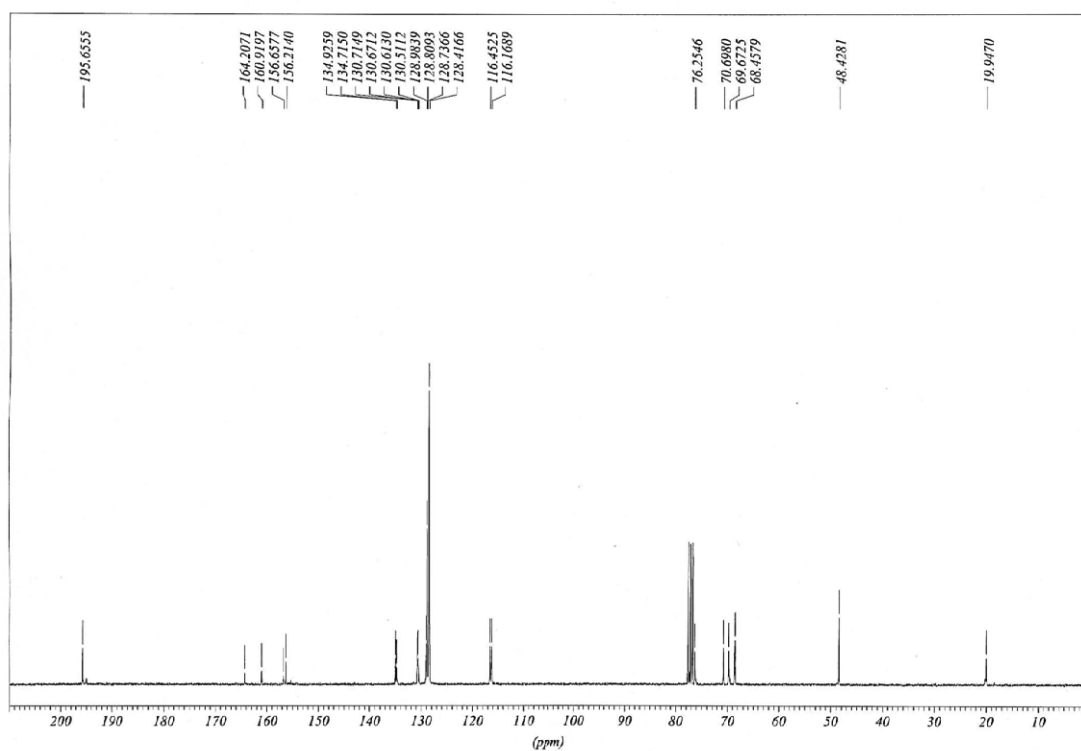

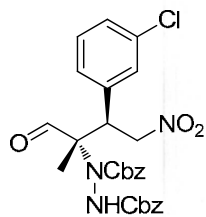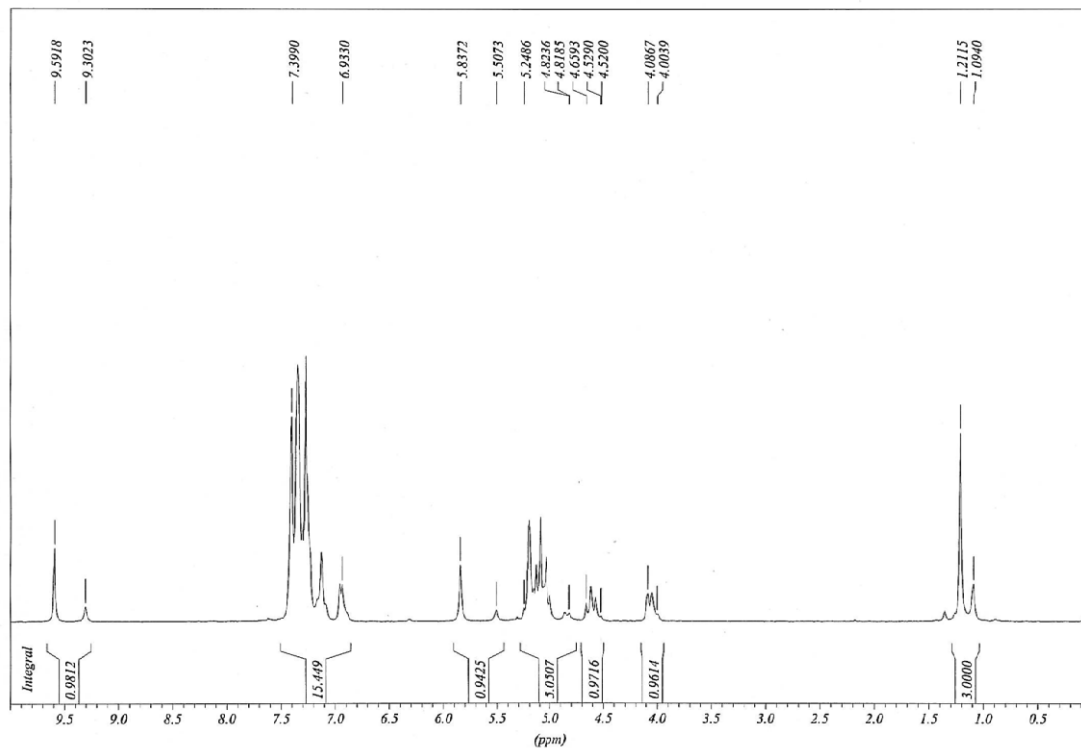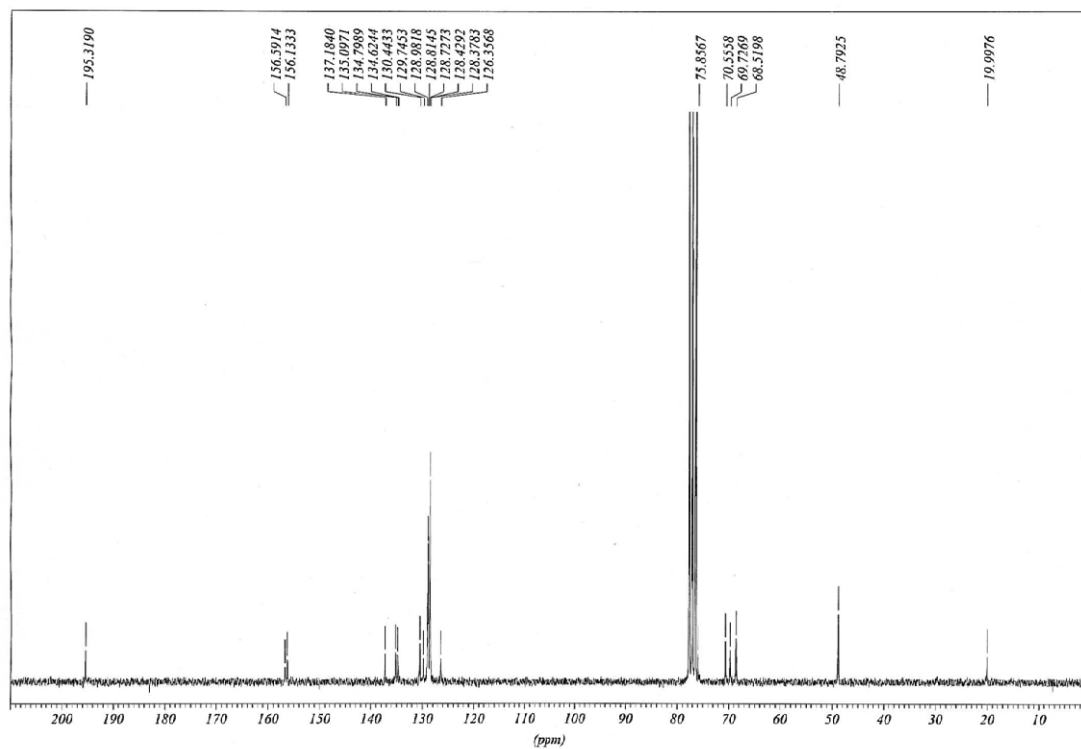

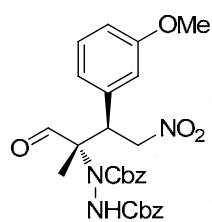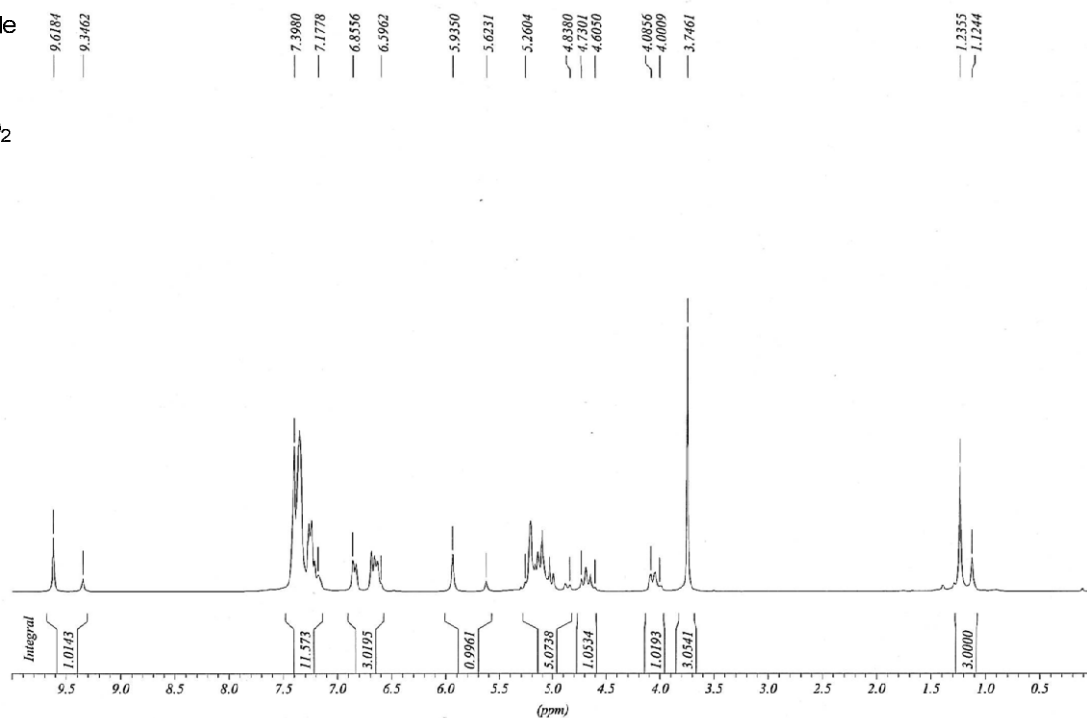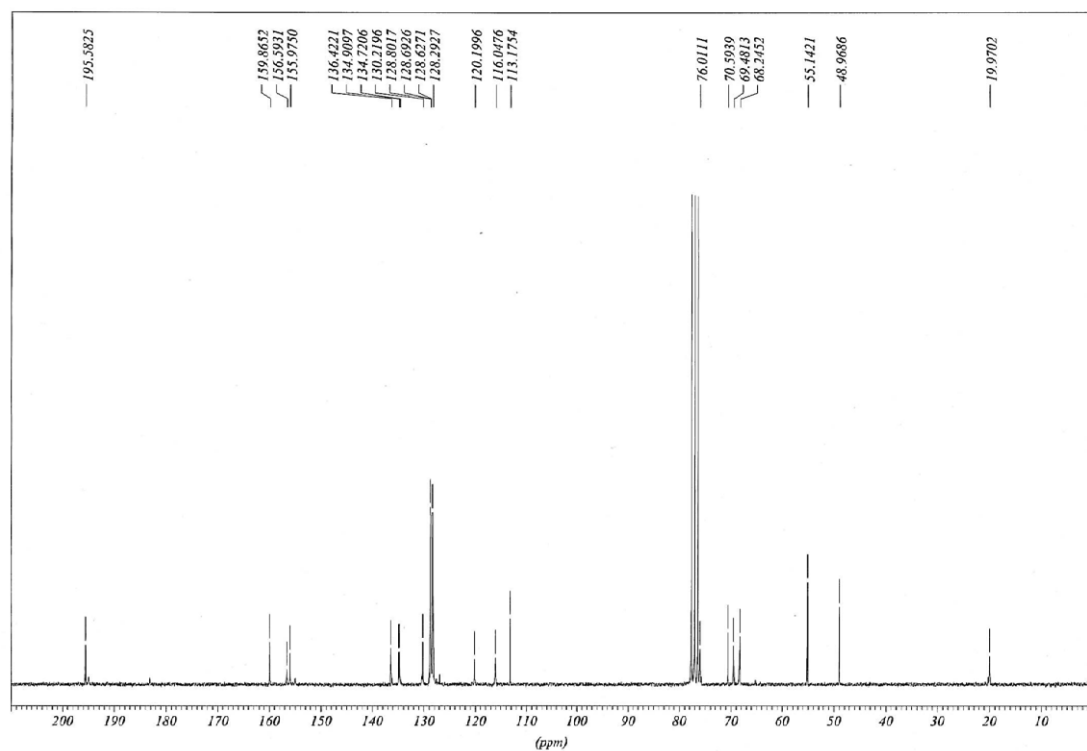

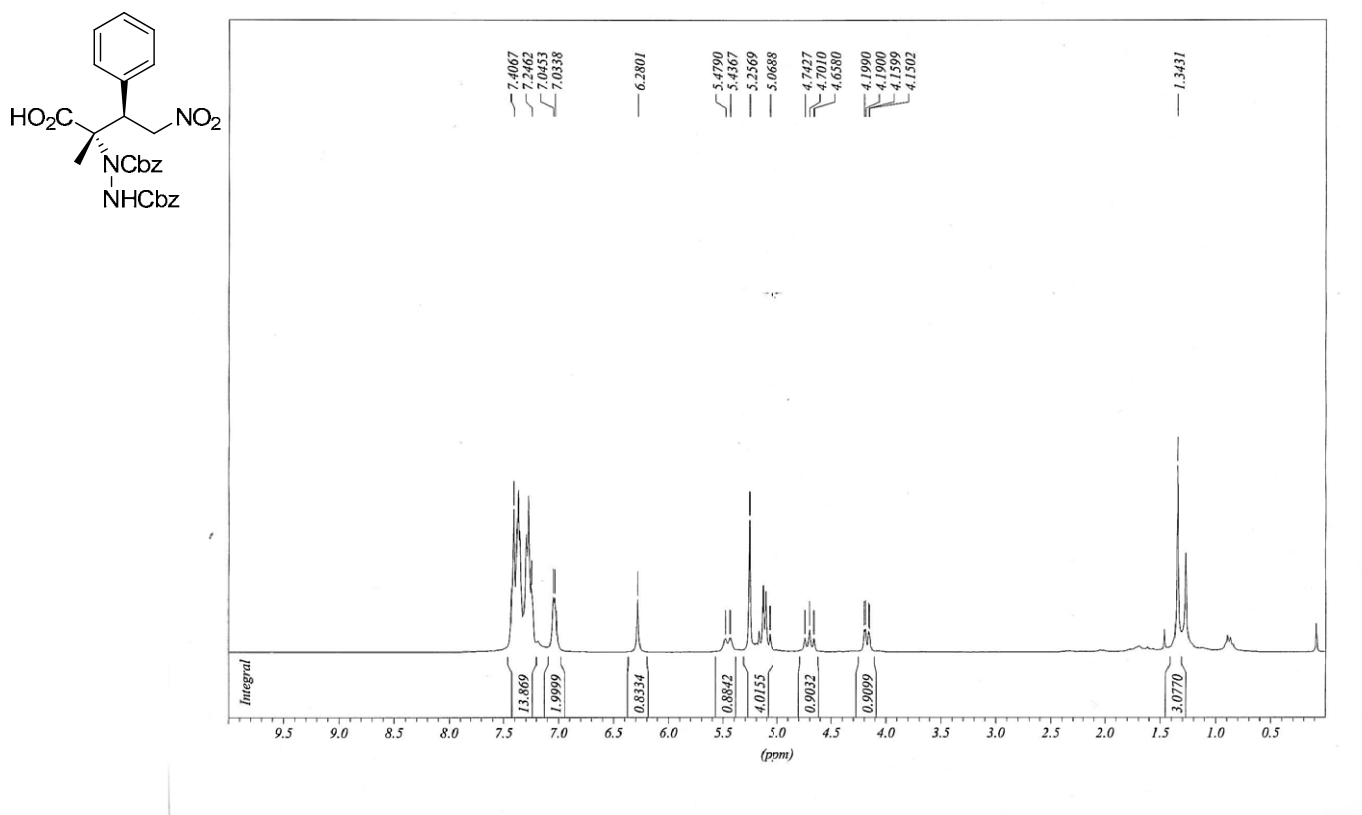

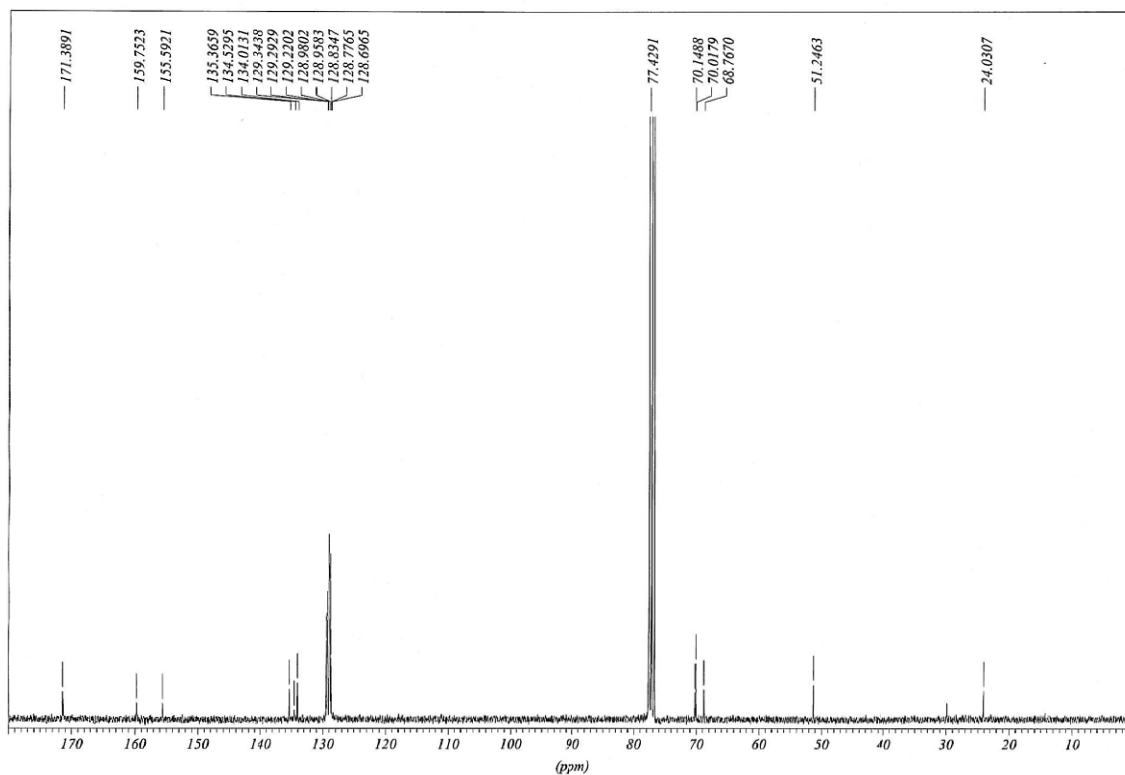

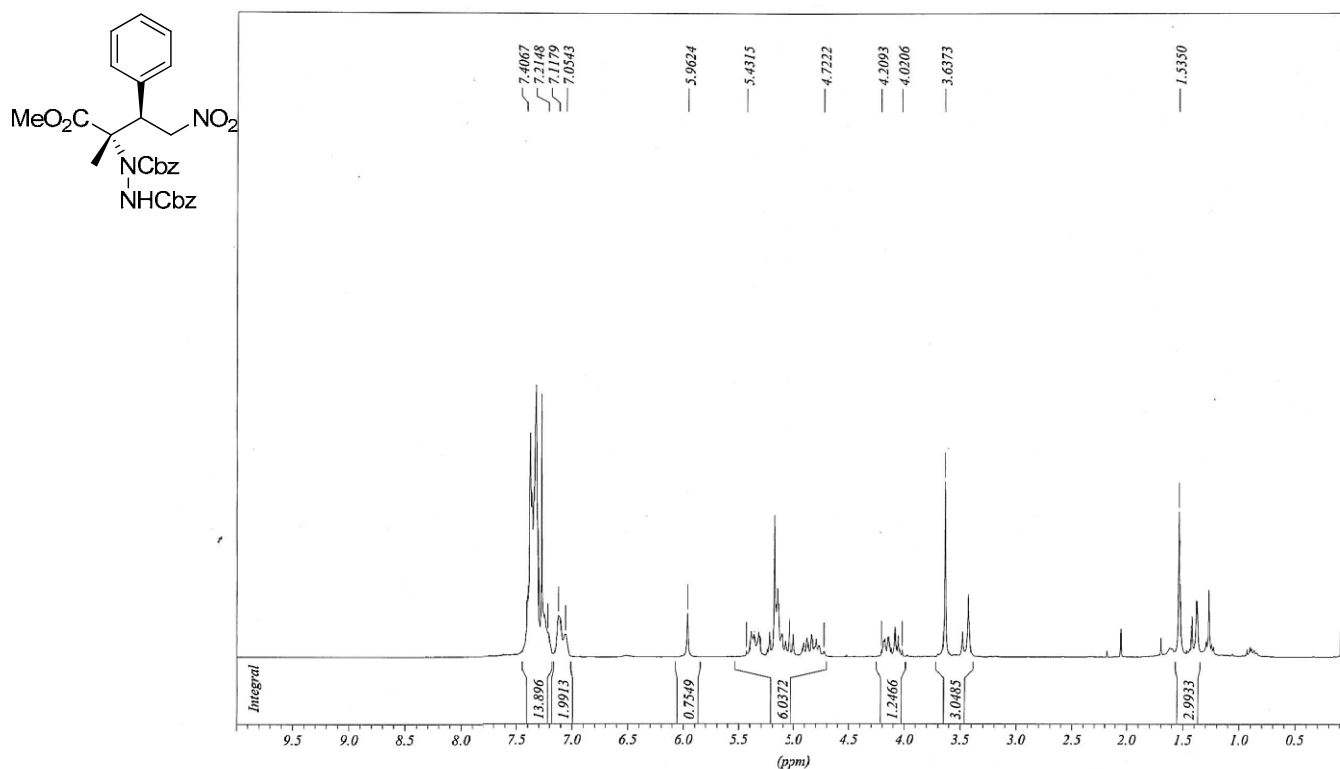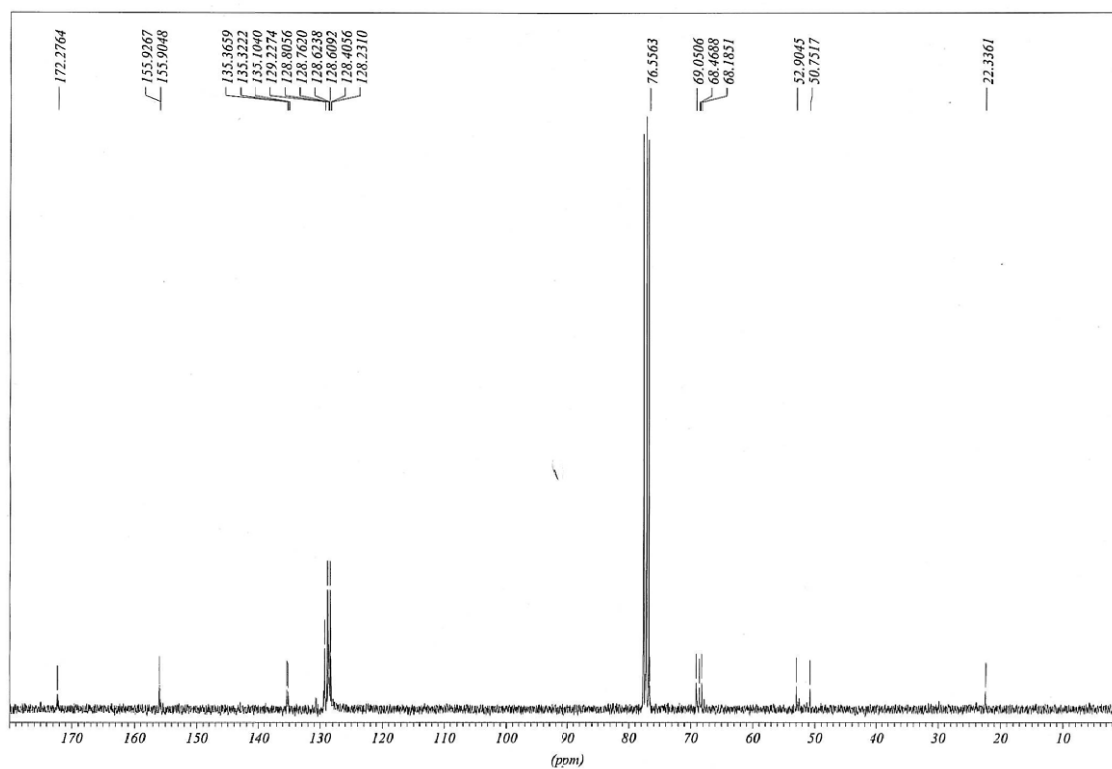

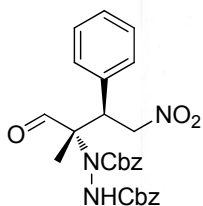

Chromatogram

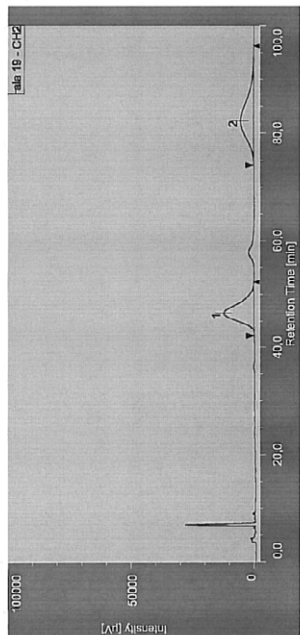

Chromatogram Information

User Name: 13/01/2010 14:43:40  
 Date Modified: 13/01/2010 14:43:40  
 Description: HPLC-JASCO  
 HPLC System Name: 13/01/2010 13:09:24  
 Injection Date: 20.00 [µL]  
 Volume: 1  
 Sample Number: 1  
 Project Name: 199.0 [min]  
 Acquisition Time: ala 19 AS 90-10 H-PCOH 0.8ml  
 Acquisition Sequence: H-PCOH 90-10 0.8 mL  
 Control Method: H-PCOH 90-10 0.8 mL  
 Peak ID Table:  
 Calibration Method:  
 Additional Information:

Channel & Peak Information Table

Chromatogram Name: ala 19-CH2  
 Sample Name: CH2  
 Channel Name: 100 [msec]  
 Sampling Interval: (Manual)  
 Peak Method:  
 Formula:

| # | Peak Name | RT [min] | Area [µVsec] | Height [µV] | Area%  | Quantity | NTP | Resolution | Symmetry Factor | Warning |
|---|-----------|----------|--------------|-------------|--------|----------|-----|------------|-----------------|---------|
| 1 | Unknown   | 44.340   | 279183       | 1204        | 99.667 | 69.775   | N/A | 1043       | 3.78            | 1-21    |
| 2 | Unknown   | 82.271   | 266251       | 338         | 93.8   | 30.25    | N/A | 85         | N/A             | 1-20    |

1/1

Chromatogram

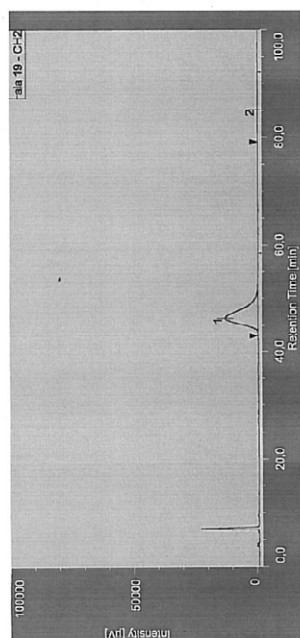

Chromatogram Information

User Name: 13/01/2010 16:33:36  
 Date Modified: 13/01/2010 14:53:21  
 Description: HPLC-JASCO  
 HPLC System Name: 13/01/2010 14:53:21  
 Injection Date: 20.00 [µL]  
 Volume: 1  
 Sample Number: 1  
 Project Name: Xavier  
 Acquisition Time: ala 19 AS 90-10 H-PCOH 0.8ml  
 Acquisition Sequence: H-PCOH 90-10 0.8 mL  
 Control Method: H-PCOH 90-10 0.8 mL  
 Peak ID Table:  
 Calibration Method:  
 Additional Information:

Channel & Peak Information Table

Chromatogram Name: ala 19-CH2  
 Sample Name: CH2  
 Channel Name: 100 [msec]  
 Sampling Interval: (Manual)  
 Peak Method:  
 Formula:

| # | Peak Name | RT [min] | Area [µVsec] | Height [µV] | Area%  | Quantity | NTP  | Resolution | Symmetry Factor | Warning |
|---|-----------|----------|--------------|-------------|--------|----------|------|------------|-----------------|---------|
| 1 | Unknown   | 44.521   | 13376        | 98.115      | 99.038 | N/A      | 1441 | 4.51       | N/A             | 1-656   |
| 2 | Unknown   | 478.59   | 138          | 1.85        | 0.988  | N/A      | 762  | N/A        | N/A             | 1-653   |

1/1

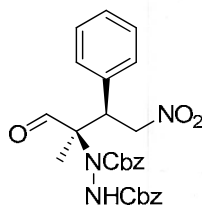

Chromatogram

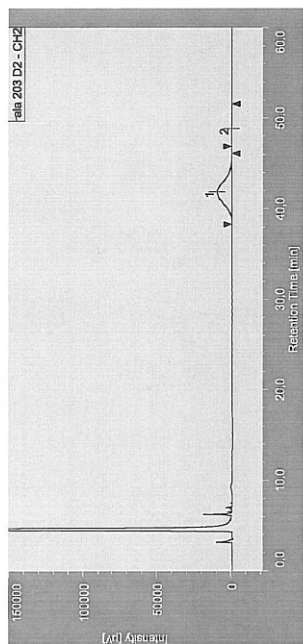

Chromatogram Information

User Name: itv  
 Date Modified: 22/10/2010 14:31:22  
 Description: HPLC-JASCO  
 Injection Date: 22/10/2010 13:15:57  
 Volume: 20.00 [µL]  
 Sample Number: 1  
 Project Name: Xavier  
 Acquisition Time: 199.0 [min]  
 Acquisition Sequence: ala\_203.D2\_00\_95-5\_H-IP-0H\_1ml  
 Control Method: H-IP-0H 95-5 1 mL  
 Peak ID Table: Additional Information

Channel & Peak Information Table

Channel Name: ala\_203.D2-CH2  
 Sample Name: CH2  
 Channel Name: CH2  
 Sampling Interval: 100 [msec]  
 Peak Method: (Manual)  
 Formula:

| # | Peak Name | CHI | IR [cm <sup>-1</sup> ] | Area [µVsec] | Height [µV] | Area% | Height% | Quantity | NTP | Resolution | Symmetry Factor | Warning |
|---|-----------|-----|------------------------|--------------|-------------|-------|---------|----------|-----|------------|-----------------|---------|
| 1 | Unknown   | 2   | 41,564                 | 136958       | 1906        | 100   | 100     | 2.24     | N/A | 857        | N/A             | -1.188  |
| 2 | Unknown   | 3   | 48,825                 | 48,825       | 35378       | 21    | 195     | 2260     | N/A | 857        | N/A             |         |

Chromatogram

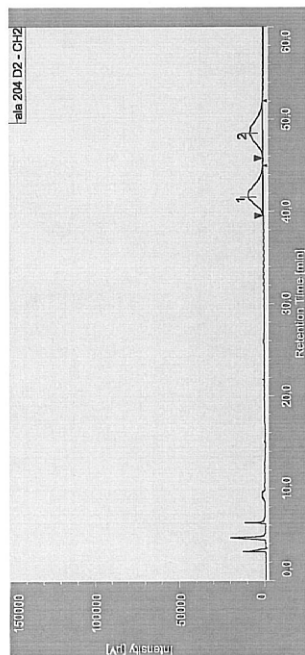

Chromatogram Information

User Name: itv  
 Date Modified: 21/10/2010 14:12:16  
 Description: HPLC-JASCO  
 Injection Date: 21/10/2010 12:45:50  
 Volume: 20.00 [µL]  
 Sample Number: 1  
 Project Name: Xavier  
 Acquisition Time: 199.0 [min]  
 Acquisition Sequence: ala\_204.D2\_00\_95-5\_H-IP-0H\_1ml  
 Control Method: H-IP-0H 95-5 1 mL  
 Peak ID Table: Additional Information

Channel & Peak Information Table

Channel Name: ala\_204.D2-CH2  
 Sample Name: CH2  
 Channel Name: CH2  
 Sampling Interval: 100 [msec]  
 Peak Method: (Manual)  
 Formula:

| # | Peak Name | CHI | IR [cm <sup>-1</sup> ] | Area [µVsec] | Height [µV] | Area% | Height% | Quantity | NTP | Resolution | Symmetry Factor | Warning |
|---|-----------|-----|------------------------|--------------|-------------|-------|---------|----------|-----|------------|-----------------|---------|
| 1 | Unknown   | 2   | 41,564                 | 126958       | 885         | 100   | 100     | 3.23     | N/A | 187        | N/A             | -1.21   |
| 2 | Unknown   | 3   | 48,825                 | 7284         | 7284        | 5.78  | 46.03   | 46.03    | N/A | 187        | N/A             | -1.21   |



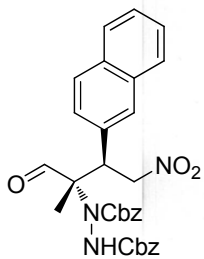

### Chromatogram

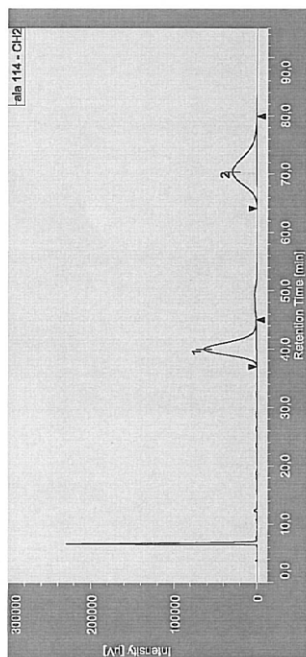

#### Chromatogram Information

User Name: ilv  
 Date Modified: 08/06/2010 17:45:47  
 Date Acquired: 08/06/2010 16:10:27  
 HPLC System Name: HPLC-JASCO  
 Injection Date: 08/06/2010 16:10:27  
 Volume: 20.00 [µL]  
 Sample Number: 1  
 Project Name: Xawier  
 Acquisition Time: 199.0 [min]  
 Acquisition Sequence: ala 114 Run AS 96-101-IPROH 0.8ml  
 Control Method: HPLC01700-10.08.mil  
 Peak ID Table:  
 Calibration Method:  
 Additional Information:

#### Channel & Peak Information Table

Chromatogram Name: ala 114-CH2  
 Sample Name:  
 Channel Name: C12  
 Sampling Interval: 100 [msec]  
 Peak Method: (Manual)  
 Formula:

| Peak Name | Ch | IR [cm <sup>-1</sup> ] | Area [V*sec] | Height [µV] | Average | Height | Quantity | NTP  | Resolution | Symmetry Factor | Warning |
|-----------|----|------------------------|--------------|-------------|---------|--------|----------|------|------------|-----------------|---------|
| 1         | 2  | 2930                   | 10000551     | 29366       | 31623   | 31623  | 50.004   | 50.0 | 50.0       | 4.67            | 1.18    |
| 2         | 2  | 2930                   | 10000551     | 29366       | 31623   | 31623  | 50.004   | 50.0 | 50.0       | 4.67            | 1.18    |

### Chromatogram

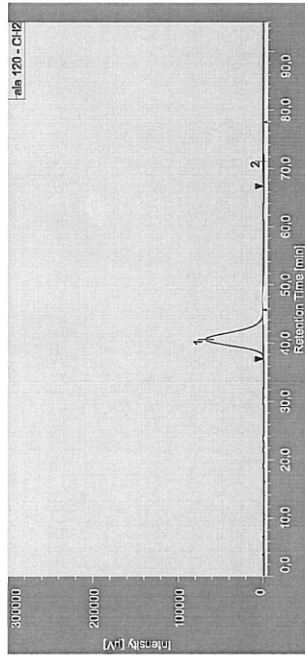

#### Chromatogram Information

User Name: iv  
 Date Modified: 08/06/2010 14:14:00  
 Software: HPLC-ASCO  
 HPLC System Name: 08/06/2010 12:36:34  
 Injection Date: 20.00 [µL]  
 Volume: 1  
 Sample Number: Xaver  
 Project Name: ala 120 [min]  
 Acquisition Time: ala 120 AS 90.00 H-IP-0H 0.8ml  
 Acquisition Sequence: H-IP-0H 30-10 0.8 ml  
 Control Method:  
 Peak ID Table:  
 Calibration Method:  
 Additional Information:

#### Channel & Peak Information Table

Chromatogram Name: ala 120-CH2  
 Sample Name: CH2  
 Channel Name: 100 [µsec]  
 Sampling Interval: (Manual)  
 Peak Method:  
 Formula:

| # | Peak Name | Ch | IR [min] | Area [V*sec] | Height [V] | Area% | Height% | Quantity | NTP | Resolution | Symmetry Factor | Warning |
|---|-----------|----|----------|--------------|------------|-------|---------|----------|-----|------------|-----------------|---------|
| 1 | Unknown   | 1  | 71.72    | 11468        | 67         | 2.13  | 78.63   | 140      | 140 | 3.02       | 1.15            |         |
| 2 | Unknown   | 2  | 71.72    | 24031        | 21         | 1.13  | 14.4    | 140      | 140 | 3.04       | 1.22            |         |

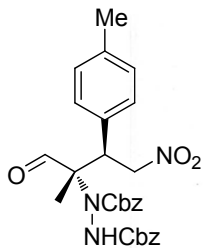

### Chromatogram

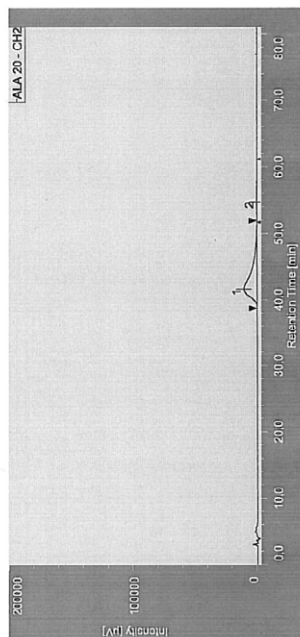

#### Chromatogram Information

User Name: ib  
 User Modified: 08/12/2009 13:24:57  
 Description: HPLC-JASCO  
 HPLC System Name: 08/12/2009 12:03:38  
 Injection Date: 20.00 [µL]  
 Volume: 20.00 [µL]  
 Project Name: Xciber  
 Sample Number: 189.0 (min)  
 Acquisition Time: al20 CD 95-5 H-IP(OH) ml  
 Acquisition Sequence: H-IP(OH) 95-5 1 mL  
 Control Method: Calibration Method  
 Peak ID Table: Additional Information

#### Channel & Peak Information Table

Chromatogram Name: ALA 20-CH2  
 Sample Name: CH2  
 Channel Name: 100 (min)  
 Sampling Interval: (Manual)  
 Peak Method: Formula

| # | Peak Name | CH | IR (min) | Area (µVsec) | Height (µV) | AveSk | Height (µV) | Area (µVsec) | Height (µV) | Quantity | NTP | Resolution | Symmetry Factor | Warning |
|---|-----------|----|----------|--------------|-------------|-------|-------------|--------------|-------------|----------|-----|------------|-----------------|---------|
| 1 | Unknown   | 2  | 41.627   | 264037       | 10733       | 97.02 | 98.003      | N/A          | 776         | 1.988    | N/A | 2.151      |                 |         |
| 2 | Unknown   | 2  | 41.627   | 34377        | 218         | 2.018 | 1.997       | N/A          | 525         | N/A      | N/A | 1.711      |                 |         |

1 / 1

### Chromatogram

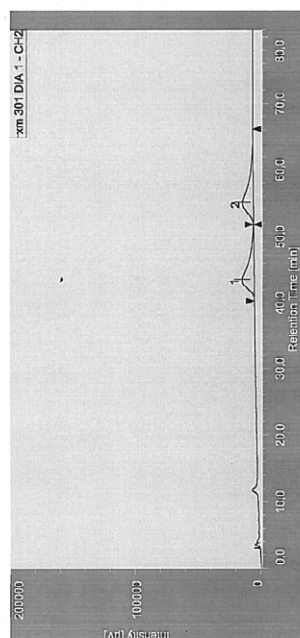

#### Chromatogram Information

User Name: ib  
 User Modified: 08/12/2009 12:01:28  
 Description: HPLC-JASCO  
 HPLC System Name: 08/12/2009 10:40:25  
 Injection Date: 20.00 [µL]  
 Volume: 20.00 [µL]  
 Project Name: Xciber  
 Sample Number: 189.0 (min)  
 Acquisition Time: xm301 dia 1 OD 95-5 H-IP(OH) ml  
 Acquisition Sequence: H-IP(OH) 95-5 1 mL  
 Control Method: Calibration Method  
 Peak ID Table: Additional Information

#### Channel & Peak Information Table

Chromatogram Name: xm 301 DIA 1-CH2  
 Sample Name: CH2  
 Channel Name: 100 (min)  
 Sampling Interval: (Manual)  
 Peak Method: Formula

| # | Peak Name | CH | IR (min) | Area (µVsec) | Height (µV) | AveSk  | Height (µV) | Area (µVsec) | Height (µV) | Quantity | NTP | Resolution | Symmetry Factor | Warning |
|---|-----------|----|----------|--------------|-------------|--------|-------------|--------------|-------------|----------|-----|------------|-----------------|---------|
| 1 | Unknown   | 2  | 43.57    | 2600794      | 9833        | 59.448 | 62.865      | N/A          | 713         | 1.799    | N/A | 2.064      |                 |         |
| 2 | Unknown   | 2  | 43.57    | 235447       | 8805        | 49.532 | 47.235      | N/A          | 864         | N/A      | N/A | 1.676      |                 |         |

1 / 1

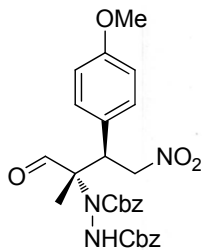

Chromatogram

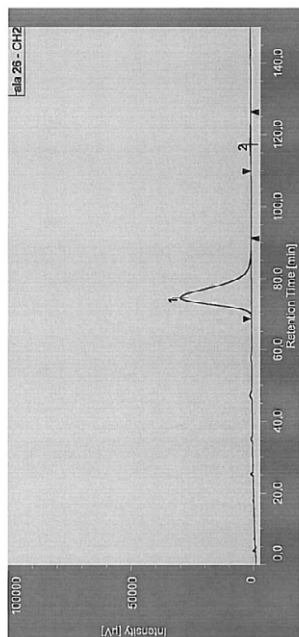

Chromatogram Information

File: 08/01/2010 11:28:32  
 Date Modified: 08/01/2010 11:28:32  
 Description: HPLC-ASCO  
 HPLC System Name: 08/01/2010 08:57:34  
 Injection Date: 20.00 [µL]  
 Volume: 20.00 [µL]  
 Sample Number: 1  
 Name: Xesic  
 Acquisition Time: 199.0 [min]  
 Acquisition Sequence: ala 26 AS 90-10 H-PROH & 8ml  
 Control Method: H-PROH: 90-10 0.8 mL  
 Peak ID Table:  
 Calibration Method:  
 Additional Information:

Channel & Peak Information Table

Chromatogram Name: ala 26-CH2  
 Sample Name: CH2  
 Volume: 100 [µsec]  
 Sampling Interval: (Manual)  
 Peak Method:  
 Formula:  
 Decision:

| # | Peak Name | RT [min] | Area [µVsec] | Height [µV] | Area%  | Height% | Quantity | NTP | Resolution | Symmetry Factor | Warning |
|---|-----------|----------|--------------|-------------|--------|---------|----------|-----|------------|-----------------|---------|
| 1 | Unknown   | 2        | 75.572       | 29024       | 93.379 | 98.875  | N/A      | 113 | 3.108      | 1.480           |         |
| 2 | Unknown   | 2        | 112.252      | 18416       | 338    | 1.021   | 1.125    | N/A | 971        | N/A             | 1117    |

1/1

Chromatogram

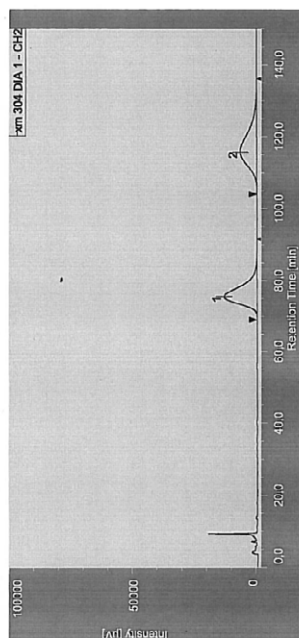

Chromatogram Information

File: 08/01/2010 14:05:35  
 Date Modified: 08/01/2010 11:36:14  
 Description: HPLC-ASCO  
 HPLC System Name: 08/01/2010 11:36:14  
 Injection Date: 20.00 [µL]  
 Volume: 20.00 [µL]  
 Sample Number: 1  
 Name: Xesic  
 Acquisition Time: 199.0 [min]  
 Acquisition Sequence: xm304 dia 1 AS 90-10 H-PROH 0.8ml  
 Control Method: H-PROH: 90-10 0.8 mL  
 Peak ID Table:  
 Calibration Method:  
 Additional Information:

Channel & Peak Information Table

Chromatogram Name: xm 304 DIA 1-CH2  
 Sample Name: CH2  
 Volume: 100 [µsec]  
 Sampling Interval: (Manual)  
 Peak Method:  
 Formula:  
 Decision:

| # | Peak Name | RT [min] | Area [µVsec] | Height [µV] | Area%  | Height% | Quantity | NTP  | Resolution | Symmetry Factor | Warning |
|---|-----------|----------|--------------|-------------|--------|---------|----------|------|------------|-----------------|---------|
| 1 | Unknown   | 2        | 4587804      | 1378        | 96.669 | 65.583  | N/A      | 1159 | 3.112      | 1.371           |         |
| 2 | Unknown   | 2        | 153.648      | 433888      | 671    | 45.131  | 33.413   | N/A  | 34         | N/A             | 1351    |

1/1

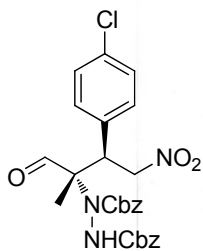

### Chromatogram

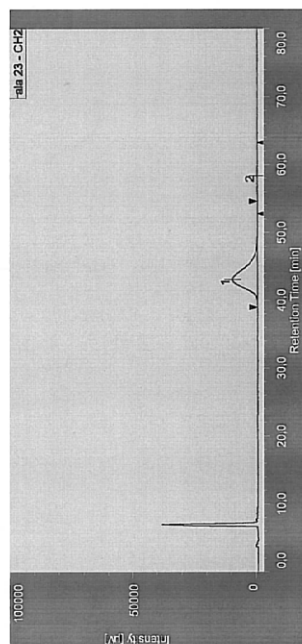

#### Chromatogram Information

User Name: ilv  
 Date Modified: 18/01/2010 17:49:12  
 Description: HPLC-JASCO  
 HPLC System Name: 1801/2010 14:48:21  
 Inlet Date: 20.00 [µl]  
 Volume: 70.00 [µl]  
 Sample Number: 1  
 Project Name: Xavier  
 Acquisition Time: 199.0 [min]  
 Acquisition Sequence: alm23 AS 90:10 H+POH 0.8ml  
 Acquisition Method: H+POH 90:10 0.8 ml  
 Peak ID Table:  
 Calibration Method:  
 Additional Information:

#### Channel & Peak Information Table

Chromatogram Name: alm23-CH2  
 Sample Name: CH2  
 Channel Name: 100 [µsec]  
 Sampling Interval: (Manual)  
 Peak Method:  
 Formula:

| Peak Name  | CHI | RT [min] | Area [Vsec] | Height [AU] | Average | Height | Quantity | NTF  | Resolution | Symmetry Factor | Wavelength |
|------------|-----|----------|-------------|-------------|---------|--------|----------|------|------------|-----------------|------------|
| 1: Unknown | 2   | 43.022   | 2086207     | 6001        | 96.801  | 99.108 | N/A      | 1044 | 1.944      | N/A             | 1.164      |
| 2: Unknown | 2   | 58.225   | 25257       | 97          | 1.195   | 0.892  | N/A      | 507  | N/A        | N/A             | 1.164      |

1/1

### Chromatogram

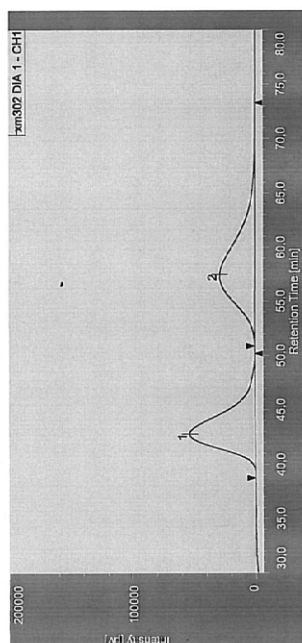

#### Chromatogram Information

User Name: ilv  
 Date Modified: 18/01/2010 17:49:11  
 Description: HPLC-JASCO  
 HPLC System Name: 1801/2010 12:28:33  
 Inlet Date: 20.00 [µl]  
 Volume: 70.00 [µl]  
 Sample Number: 1  
 Project Name: Xavier  
 Acquisition Time: 199.0 [min]  
 Acquisition Sequence: alm302 dia.1 AS 90:10 H+POH 0.8ml  
 Acquisition Method: H+POH 90:10 0.8 ml  
 Peak ID Table:  
 Calibration Method:  
 Additional Information:

#### Channel & Peak Information Table

Chromatogram Name: alm302 DIA 1-CH1  
 Sample Name: CH1  
 Channel Name: 100 [µsec]  
 Sampling Interval: (Manual)  
 Peak Method:  
 Formula:

| Peak Name  | CHI | RT [min] | Area [Vsec] | Height [AU] | Average | Height | Quantity | NTF | Resolution | Symmetry Factor | Wavelength |
|------------|-----|----------|-------------|-------------|---------|--------|----------|-----|------------|-----------------|------------|
| 1: Unknown | 1   | 42.766   | 11743064    | 53073       | 50.234  | 65.267 | N/A      | 866 | 1.786      | N/A             | 1.431      |
| 2: Unknown | 1   | 57.152   | 11633718    | 28242       | -40.766 | 34.724 | N/A      | 427 | N/A        | N/A             | 1.327      |

1/1

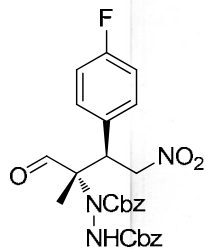

### Chromatogram

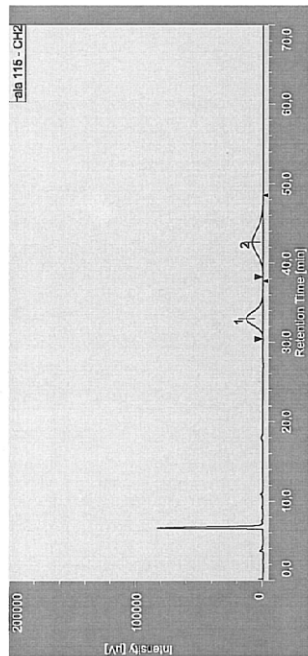

#### Chromatogram Information

User Name: itv  
 Date Modified: 09/06/2010 14:53:40  
 Operator: itv  
 HPLC System Name: HPLC-JASCO  
 Injection Date: 09/06/2010 13:40:16  
 Volume: 20.00 [µL]  
 Sample Number: 1  
 Project Name: Xaver  
 Acquisition Time: 199.0 [min]  
 Sample Substance: ala 115-CH2  
 Control Method: H-PROH 90-10 H-PROH 0.8ml  
 Peak ID Table: H-PROH 90-10 0.8 ml  
 Calibration Method:  
 Additional Information:

#### Channel & Peak Information Table

Chromatogram Name: ala 115-CH2  
 Sample Name: CH2  
 Channel Name: CH2  
 Sampling Interval: 100 [msec]  
 Peak Method: (Manual)  
 Formula:

| Peak Name | RT [min] | Area [µVsec] | Height [µV] | Area%  | Height% | Quantity | NTP | Resolution | Symmetry Factor | Warning |
|-----------|----------|--------------|-------------|--------|---------|----------|-----|------------|-----------------|---------|
| Zubson    | 4.2      | 1846248      | 2362        | 51.86% | 35.21%  | N/A      | 184 | N/A        | N/A             | 11.12   |
|           | 32.5     | 1846248      | 2362        | 51.86% | 35.21%  | N/A      | 184 | N/A        | N/A             | 11.12   |
|           | 35.2     | 1846248      | 2362        | 51.86% | 35.21%  | N/A      | 184 | N/A        | N/A             | 11.12   |

### Chromatogram

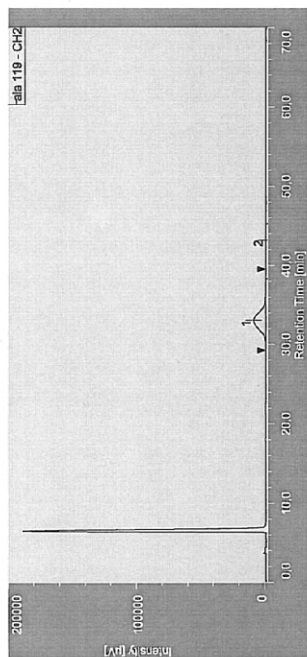

**Chromatogram Information**  
 Run: 09/06/2010 16:17:36  
 Description: HPLC-JASCO  
 HPLC System Name: 09/06/2010 15:03:44  
 Injection Date: 20.00 [uL]  
 Volume: 1  
 Sample Number: Xwater  
 Project Name: 1997 [min]  
 Acquisition Time: 09.10 [min]  
 Acquisition Sequence: H-PCOH 90-10.0.8 ml  
 Control Method: H-PCOH 90-10.0.8 mL  
 Peak ID Table:  
 Calibration Method:  
 Additional Information:

**Channel & Peak Information Table**

Chromatogram Name: ala 119-CH2  
 Sample Name: CH2  
 Channel Name: CH2  
 Sampling Interval: 100 [msec]  
 Peak Method: (Manual)  
 Formula:

| Peak Name | CH      | R [min] | Area [mV.ms] | Height [uV] | Area% | Height% | Quantity | NTP | Resolution | Symmetry Factor | Warning |
|-----------|---------|---------|--------------|-------------|-------|---------|----------|-----|------------|-----------------|---------|
| 1         | CH2     | 0.8     | 1447         | 18827       | 99.99 | 100     | N/A      | N/A | 2.00       | N/A             |         |
| 2         | Unknown | 2       | 43.155       | 22092       | 1.00  | 1.00    | N/A      | 292 | N/A        |                 | 0.265   |

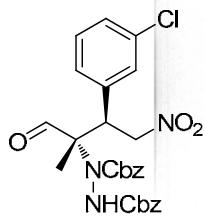

### Chromatogram

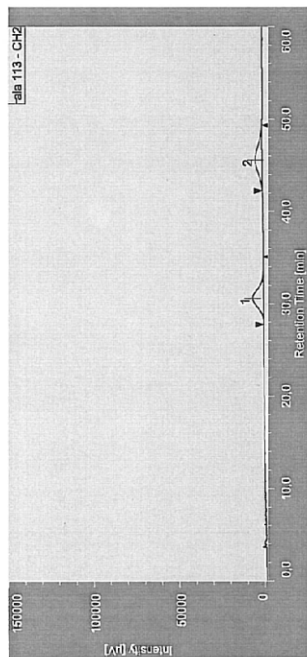

#### Chromatogram Information

User Name: iv  
 Date Modified: 10/06/2010 12:43:52  
 Date Acquired: 10/06/2010 11:53:41  
 HPLC System Name: HPLC-JASCO  
 Injection Date: 10/06/2010 11:53:41  
 Volume: 20.00 µL  
 Sample Number: 1  
 Project Name: Xaver  
 Acquisition Time: 199.01 min  
 Acquisition Sequence: 1  
 Control Method: H-PROH 90.10 H-PROH 0.8ml  
 Peak ID Table: H-PROH 90.10 0.8 mL  
 Calibration Method:  
 Additional Information:

#### Channel & Peak Information Table

Chromatogram Name: als 113-CH2  
 Sample Name:  
 Channel Name: CH2  
 Sampling Interval: 100 [msec]  
 Peak Method: (Minimal)  
 Formula:

| Peak Name   | Ch | W [min] | Area [mVsec] | Height [mV] | Area% | Height% | Quantity | NT1 | Resolution | Symmetry Factor | Warning |
|-------------|----|---------|--------------|-------------|-------|---------|----------|-----|------------|-----------------|---------|
| als 113-CH2 | 2  | 45.555  | 83112        | 4954        | 49.67 | 20.625  | N/A      | 104 | N/A        | N/A             | 1.065   |



# Chromatogram

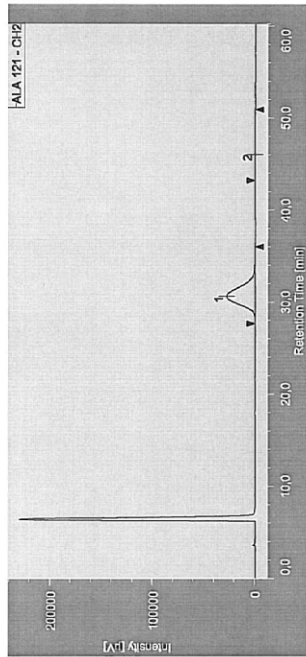

### Chromatogram Information

User Name: iv  
 Date Modified: 09/06/2010 13:25:19  
 HPLC System Name: HPLC-JASCO  
 Injection Date: 09/06/2010 12:25:03  
 Volume: 20.00 (µL)  
 Sample Number: 1  
 Project Name: Xaver  
 Acquisition Time: 199.0 [min]  
 Acquisition Sequence: ala 121 AS 90:10 H-IP-OH 0.8ml  
 Calibration Method: H-IP-OH 90:10 0.8 mL  
 Peak ID Table:  
 Additional Information:

### Channel & Peak Information Table

Chromatogram Name: ALA\_121-CH2  
 Sample Name:  
 Channel Name: CH2  
 Sampling Interval: 100 [msec]  
 Peak Method: (Manual)  
 Formula:

| Peak Name | CH | IR [mV] | Area [µV*sec] | Height [µV] | Average | Height | Quantity | NTP  | Resolution | Symmetry Factor | Warning |
|-----------|----|---------|---------------|-------------|---------|--------|----------|------|------------|-----------------|---------|
| 1         | 1  | 20.628  | 20628         | 28.5        | 95.518  | 92.528 | 1.128    | NO   | 11.1       | 3.84            | 1.174   |
| 2         | 1  | 48.565  | 48565         | 48.5        | 5.714   | 5.714  | NO       | 11.1 | 3.84       | 1.174           | 1.174   |
| 3         | 1  | 50.528  | 50528         | 50.5        | 5.714   | 5.714  | NO       | 11.1 | 3.84       | 1.174           | 1.174   |

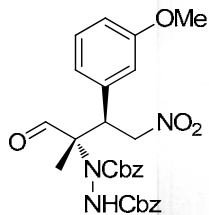

Chromatogram

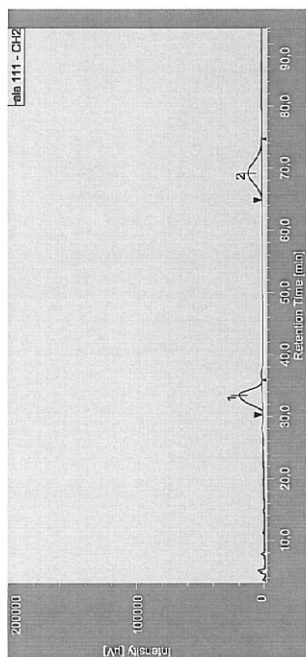

Chromatogram Information

User Name: iv  
 Date Modified: 01/07/2010 12:33:56  
 Date: 01/07/2010 12:33:56  
 HPLC System Name: HPLC-JASCO  
 Injection Date: 01/07/2010 10:48:02  
 Volume: 20.00 [uL]  
 Sample Number: 1  
 Project Name: Xavtar  
 Acquisition Time: 199.0 [min]  
 Acquisition Sequence: Inln 111-AS 99.10-14-IPROH 0.8ml  
 Control Method: HPLC-IPROH 0.8 ml  
 Peak ID Table  
 Calibration Method  
 Additional Information

Channel & Peak Information Table

Chromatogram Name: inln 111-CH2  
 Sample Name: CH2  
 Channel Name: CH2  
 Sampling Interval: 100 [msec]  
 Peak Method: (Manual)  
 Formula

| Peak Name | CH | IR [min] | Area [V Area] | Height [uV] | Average | Height | Quantity | NTP  | Resolution | Symmetry Factor | Warning |
|-----------|----|----------|---------------|-------------|---------|--------|----------|------|------------|-----------------|---------|
| 1         | 2  | 29.825   | 246716        | 18027       | 49.814  | 317.05 | N/A      | 1714 | N/A        | 0.1             | 1113    |
| 2         | 2  | 69.825   | 246716        | 18027       | 49.814  | 714.05 | N/A      | 1714 | N/A        | 0.1             | 1113    |

## Chromatogram

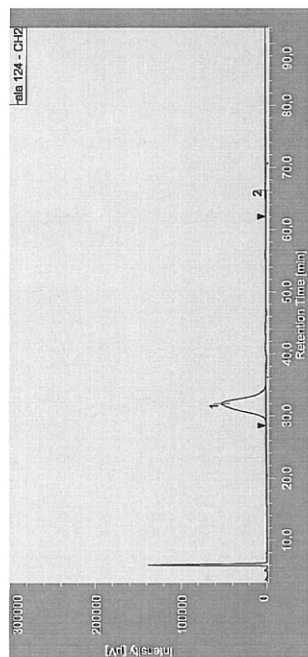

## Chromatogram Information

User Name: iv  
 Date Modified: 01/07/2010 14:40:56  
 Date: 01/07/2010 14:40:56  
 HPLC System Name: HPLC-JASCO  
 Injection Date: 01/07/2010 12:59:10  
 Volume: 20.00  $\mu$ L  
 Sample Number: 1  
 Project Name: Xaver  
 Acquisition Time: 199.0 [min]  
 Acquisition Sequence: 14-00-10 14-IP-OH 0.8ml  
 Control Method: HPLC-IP-OH 10.0 ml  
 Peak ID Table  
 Calibration Method  
 Additional Information

## Channel &amp; Peak Information Table

Chromatogram Name: ah 124-CH2  
 Sample Name: CH2  
 Channel Name: CH2  
 Sampling Interval: 100 [msec]  
 Peak Method: (Manual)  
 Formula

| Peak Name | Ch | IR [min] | Area [V*min] | Height [V] | Area% | Height% | Quantity | NTP | Resolution | Symmetry Factor | Warning |
|-----------|----|----------|--------------|------------|-------|---------|----------|-----|------------|-----------------|---------|
| 1         | 1  | 100.00   | 46325        | 272        | 2.124 | 1.121   | N/A      | 100 | N/A        | 0.945           |         |
| 2         | 2  | 310.00   | 15911        | 219        | 1.132 | 1.132   | N/A      | 100 | N/A        | 0.945           |         |

ORTEP diagram of 4

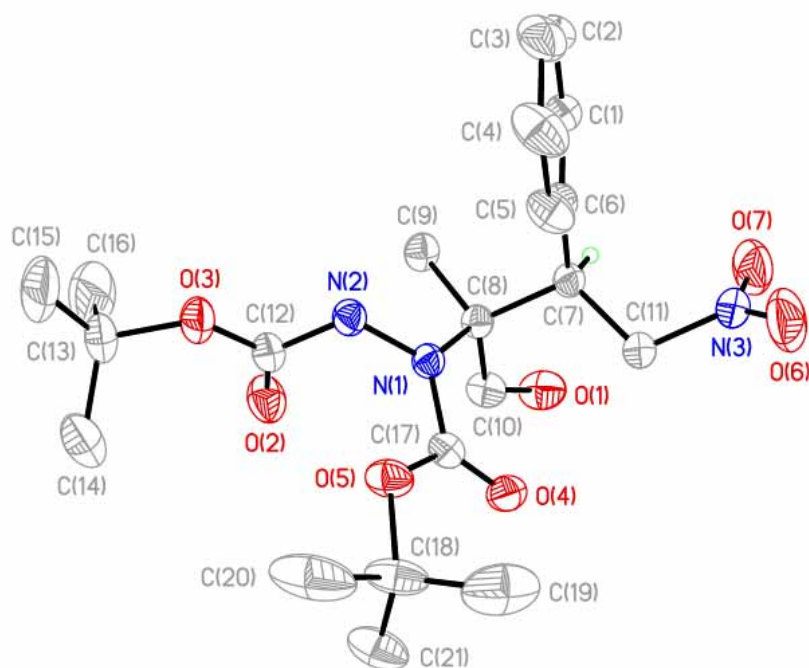

Supplement: c0ob00751j.pdf [file c0ob00751j.pdf]
